# Supplementary material for: New α-galactosidase-inhibiting aminohydroxycyclopentanes
Source: Royal Society of Chemistry journal article supplement (doi:10.1039/d1ra02507d), 2021-01-01

## Supplementary Materials:

### New $\alpha$ -galactosidase-inhibiting aminohydroxycyclopentanes

Patrick Weber,<sup>\*[a]</sup> Roland Fischer,<sup>[b]</sup> Seyed A. Nasser, <sup>[c]</sup> Arnold E. Stütz,<sup>[a]</sup> Martin Thonhofer,<sup>[a]</sup> Stephen G. Withers,<sup>[c]</sup> Andreas Wolfsgruber,<sup>[a]</sup> and Tanja M. Wrodnigg<sup>[a]</sup>

<sup>[a]</sup>*Glycogroup, Institute of Chemistry and Technology of Biobased Systems,  
Graz University of Technology, Stremayrgasse 9, A-8010 Graz, Austria*

<sup>[b]</sup>*Institute of Inorganic Chemistry, Graz University of Technology,  
Stremayrgasse 9, A-8010 Graz, Austria*

<sup>[c]</sup>*Chemistry Department, University of British Columbia,  
2036 Main Mall, Vancouver, BC, Canada V6T 1Z1*

Supplementary data: <sup>1</sup>H NMR, <sup>13</sup>C NMR, COSY, and HSQC spectra

**(3a*S*,3b*S*,6a*S*,7*S*,7a*S*)-1-Benzyl-5,5-dimethylhexahydro-1*H*-[1,3]dioxolo  
[4',5':3,4]cyclopenta[1,2-*c*]isoxazol-7-ol (16)**

**<sup>1</sup>H NMR (300 MHz, CDCl<sub>3</sub>): Compound 16**

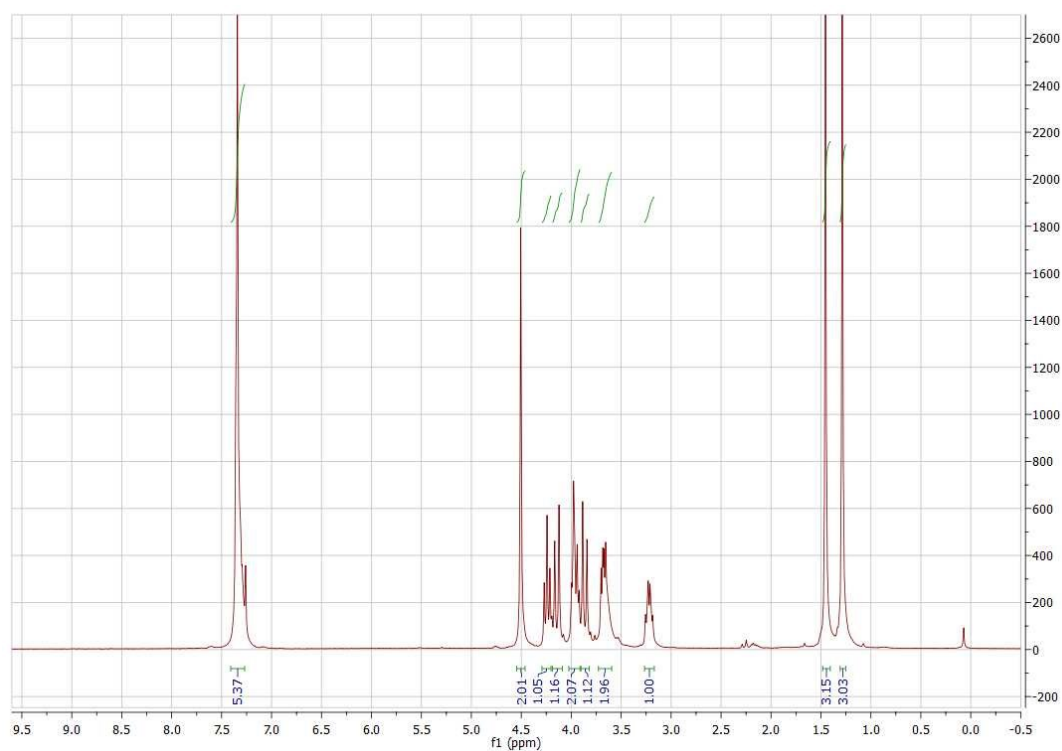

**<sup>13</sup>C NMR (75.5 MHz, CDCl<sub>3</sub>): Compound 16**

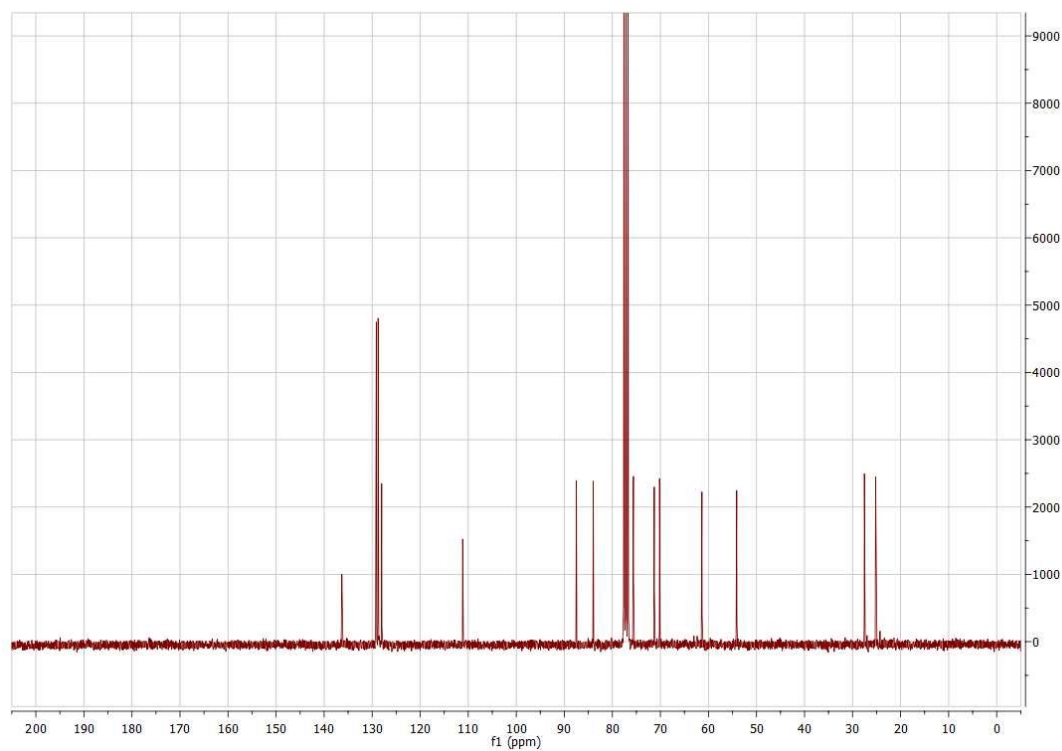

**COSY (CDCl<sub>3</sub>): Compound 16**

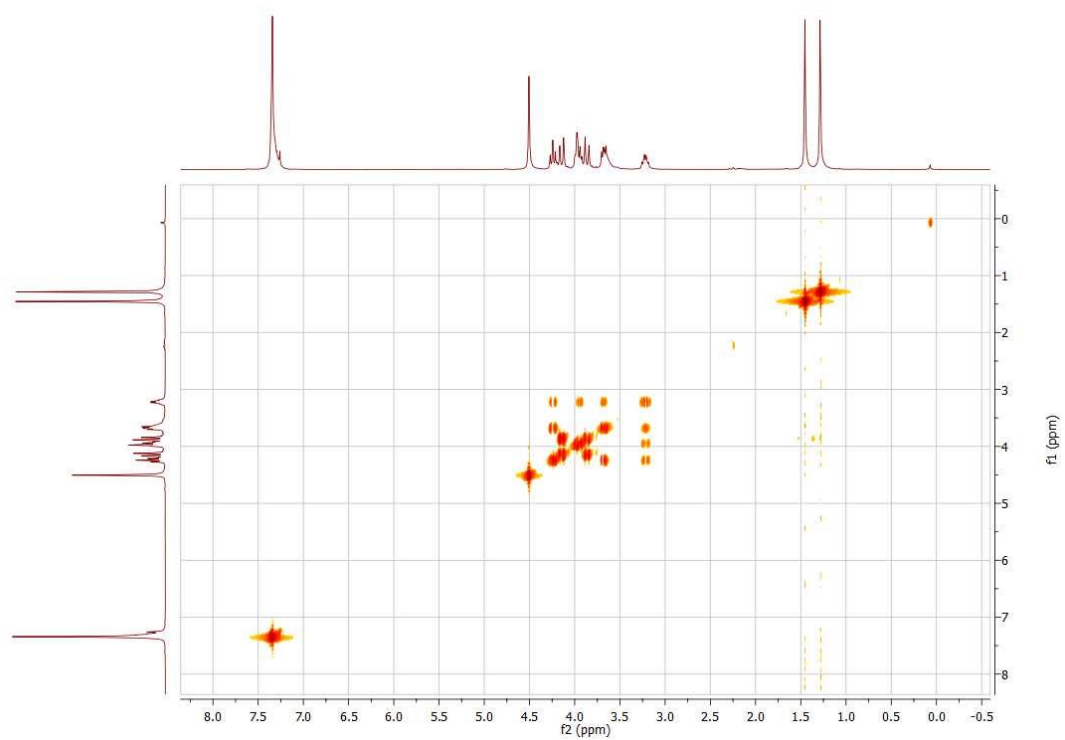

**HSQC (CDCl<sub>3</sub>): Compound 16**

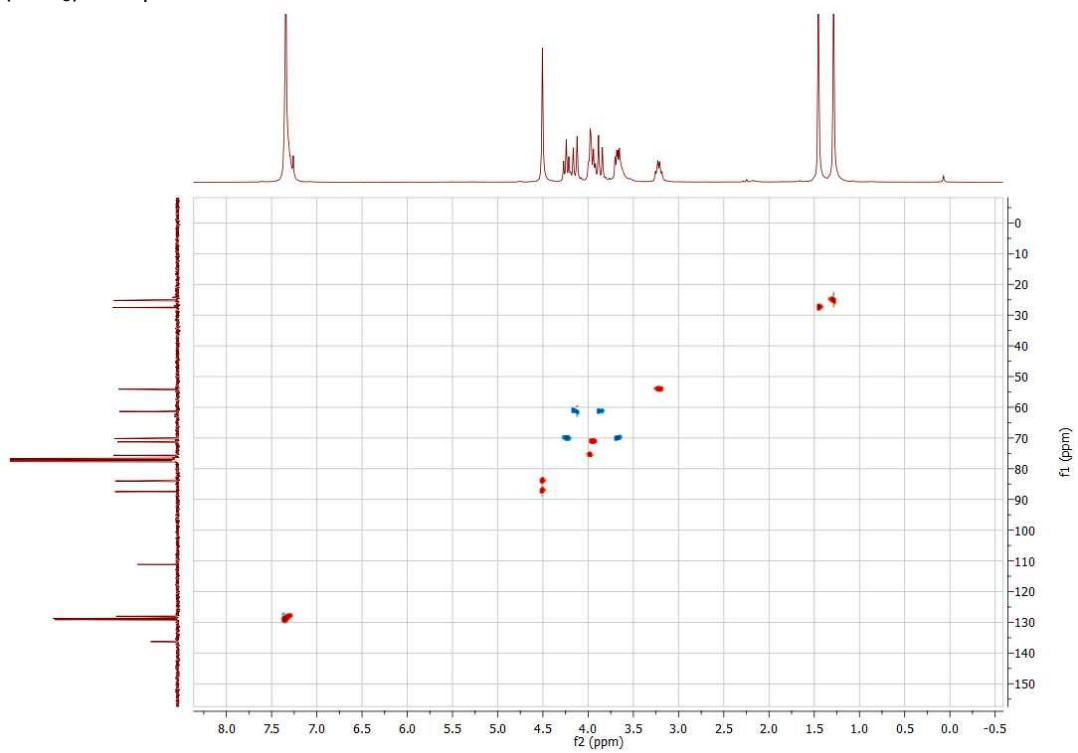

**(3a*S*,3b*S*,6a*S*,7*S*,7a*S*)-1-Benzyl-7-(methoxymethoxy)-5,5-dimethylhexahydro-1*H*-[1,3]dioxolo[4',5':3,4]cyclopenta[1,2-*c*]isoxazole (17)**

<sup>1</sup>H NMR (300 MHz, CDCl<sub>3</sub>): Compound 17

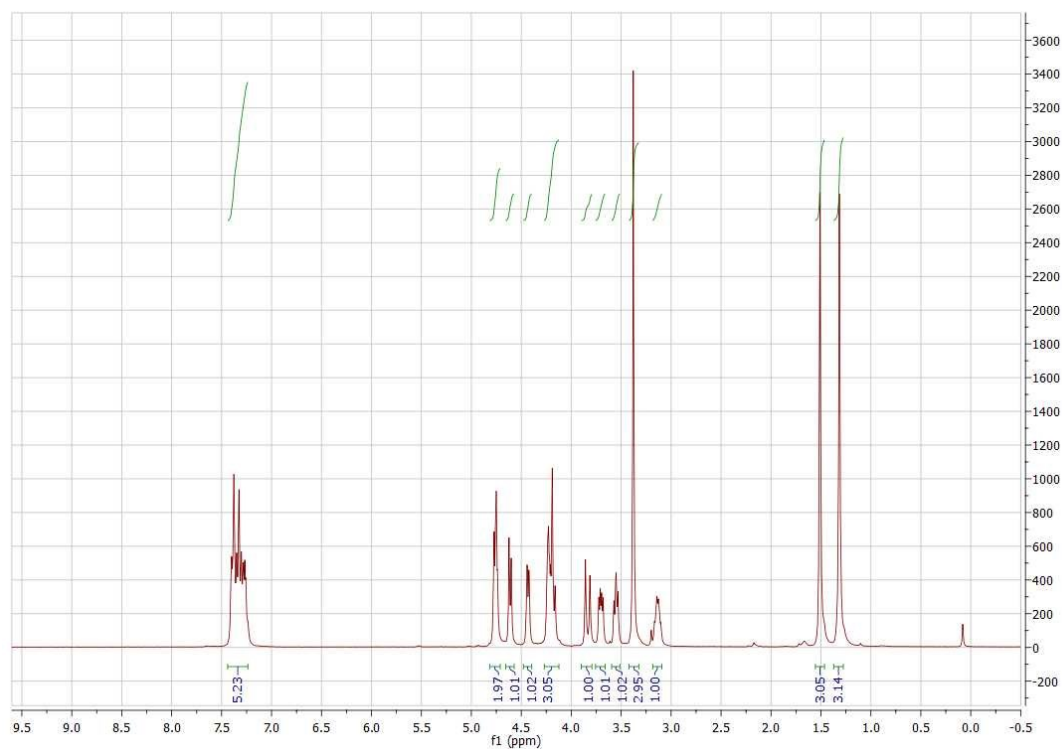

<sup>13</sup>C NMR (75.5 MHz, CDCl<sub>3</sub>): Compound 17

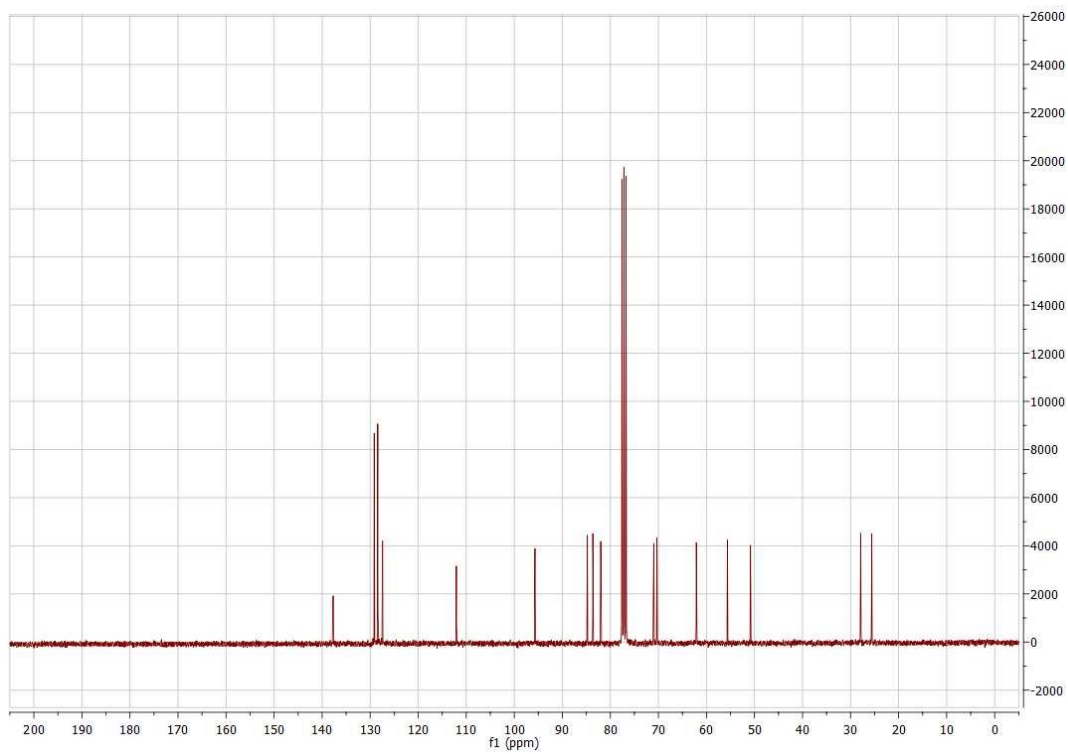

**COSY (CDCl<sub>3</sub>): Compound 17**

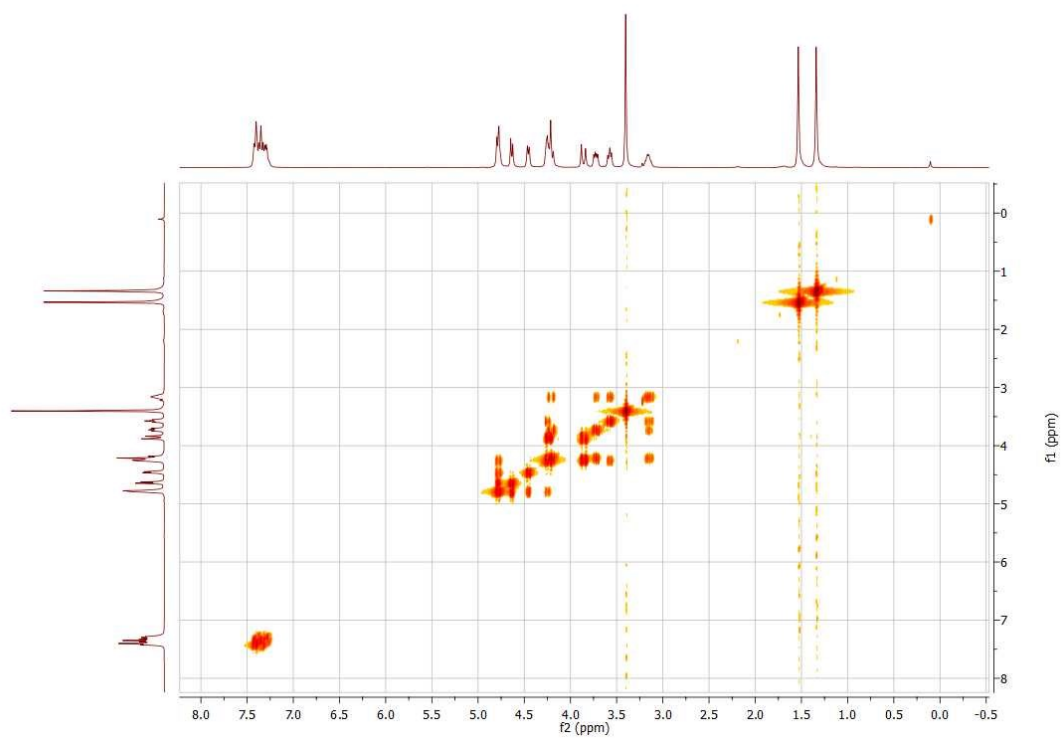

**HSQC (CDCl<sub>3</sub>): Compound 17**

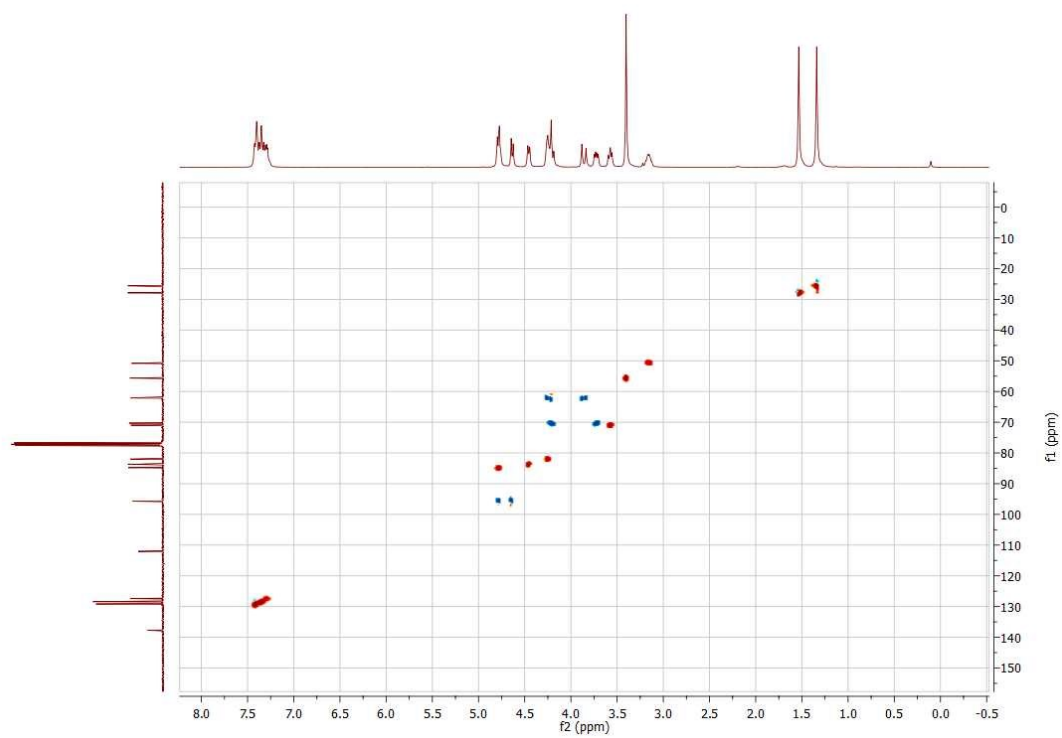

***tert*-Butyl [(3*aS*,4*S*,5*S*,6*S*,6*aS*)-4-(hydroxymethyl)-6-(methoxymethoxy)-2,2-dimethyl tetrahydro-4H-cyclopenta[*d*][1,3]dioxol-5-yl]carbamate or 1-(*tert*-Butyloxycarbonyl) amino-3,4-*O*-isopropylidene-2-*O*-methoxymethyl- $\beta$ -L-*altro*-cyclopentane (18)**

<sup>1</sup>H NMR (300 MHz, CDCl<sub>3</sub>): Compound 18

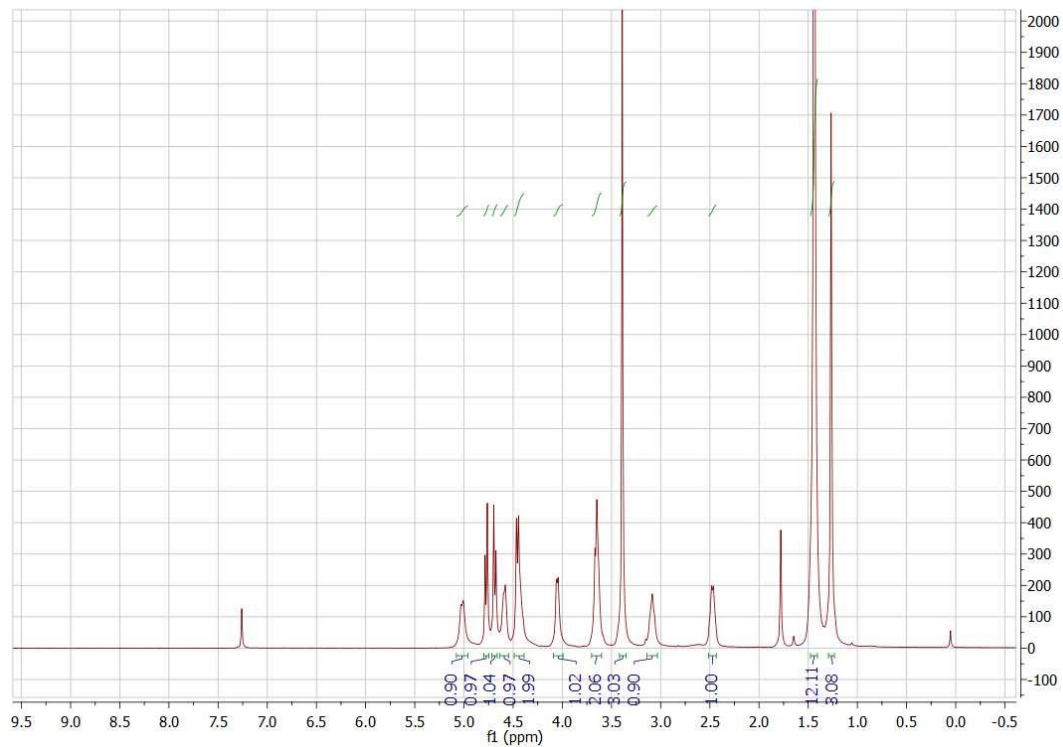

<sup>13</sup>C NMR (75.5 MHz, CDCl<sub>3</sub>): Compound 18

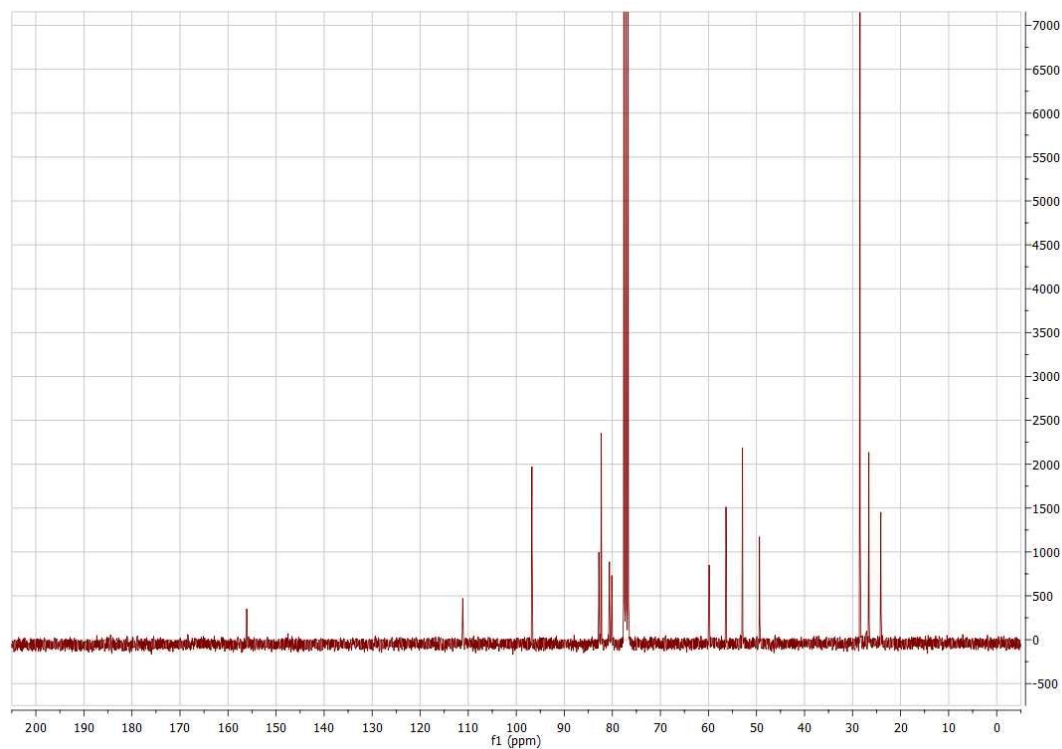

**COSY (CDCl<sub>3</sub>): Compound 18**

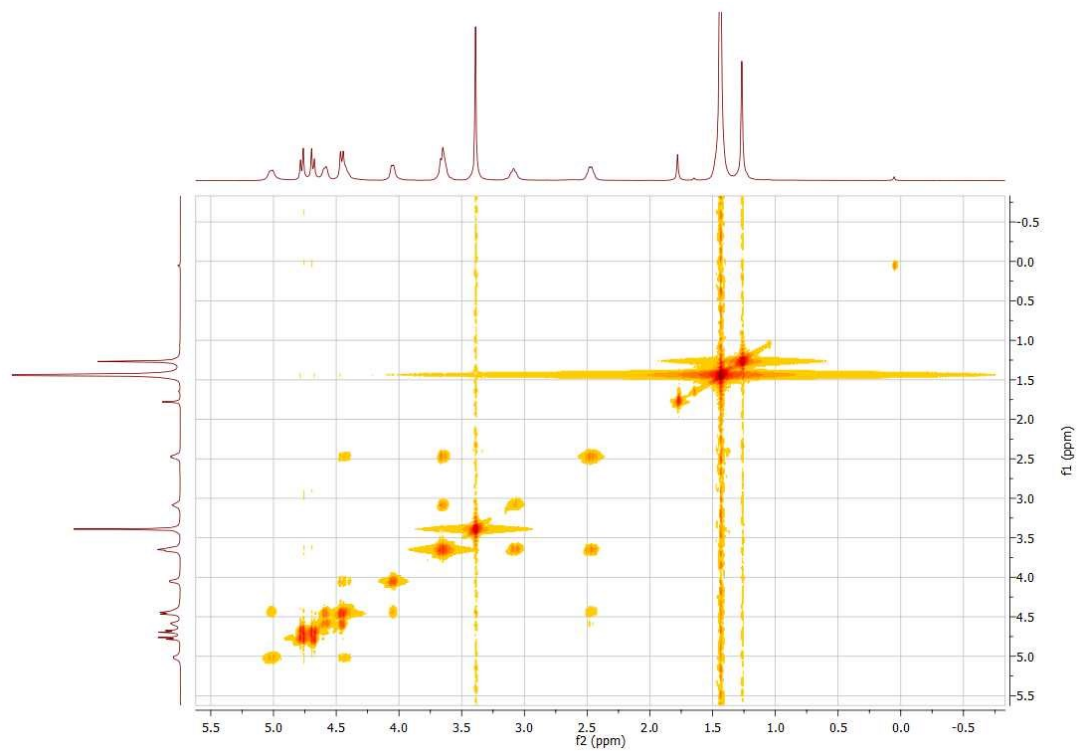

**HSQC (CDCl<sub>3</sub>): Compound 18**

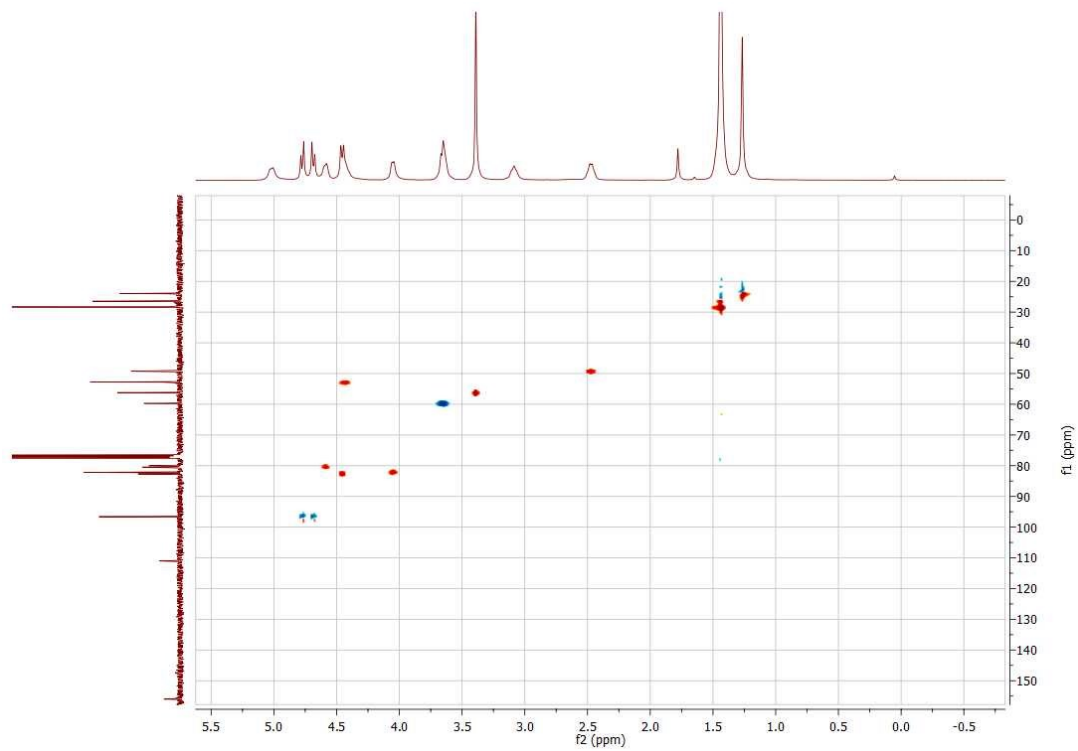

***tert*-Butyl [(3*aS*,4*R*,5*S*,6*S*,6*aS*)-4-(hydroxymethyl)-6-(methoxymethoxy)-2,2-dimethyl tetrahydro-4*H*-cyclopenta[*d*][1,3]dioxol-5-yl]carbamate or 1-(*tert*-Butyloxycarbonyl) amino-3,4-*O*-isopropylidene-2-*O*-methoxymethyl- $\alpha$ -D-*galacto*-cyclopentane (**21**)**

<sup>1</sup>H NMR (300 MHz, CDCl<sub>3</sub>): Compound **21**

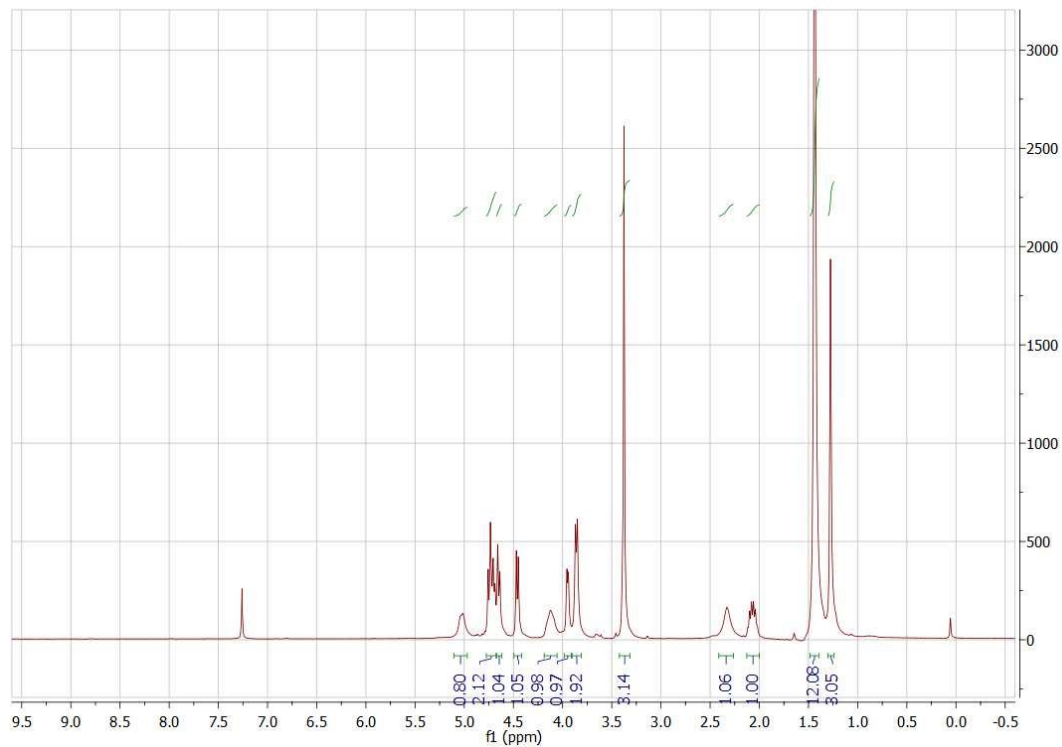

<sup>13</sup>C NMR (75.5 MHz, CDCl<sub>3</sub>): Compound **21**

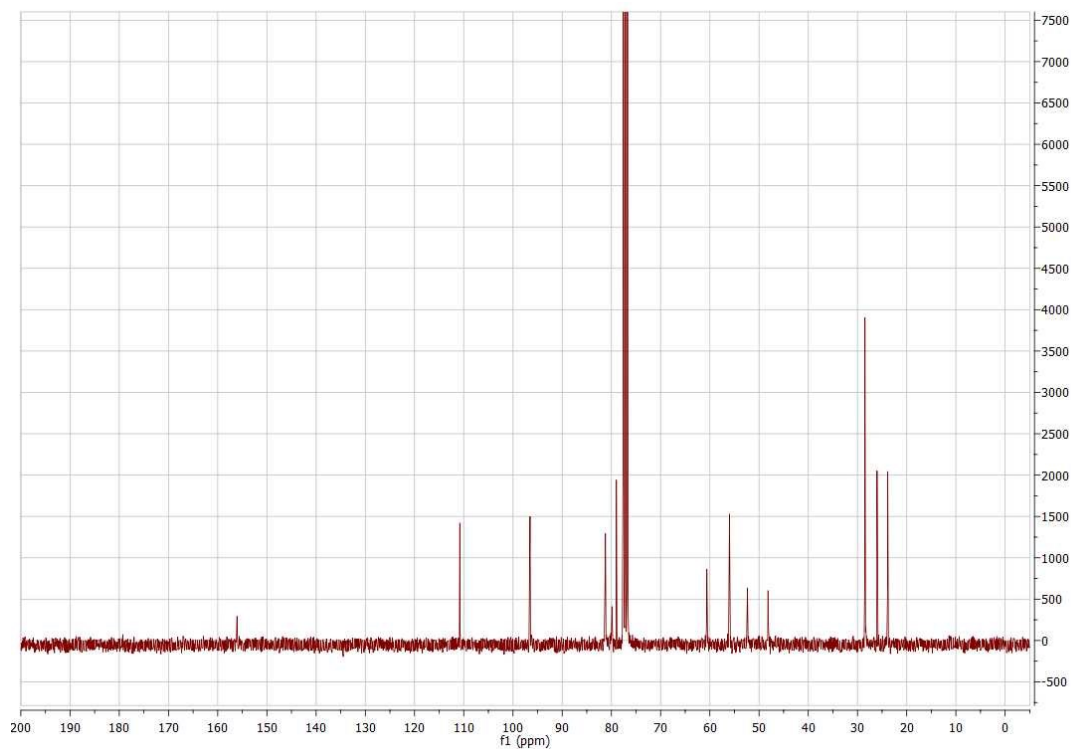



**COSY (CDCl<sub>3</sub>): Compound 21**

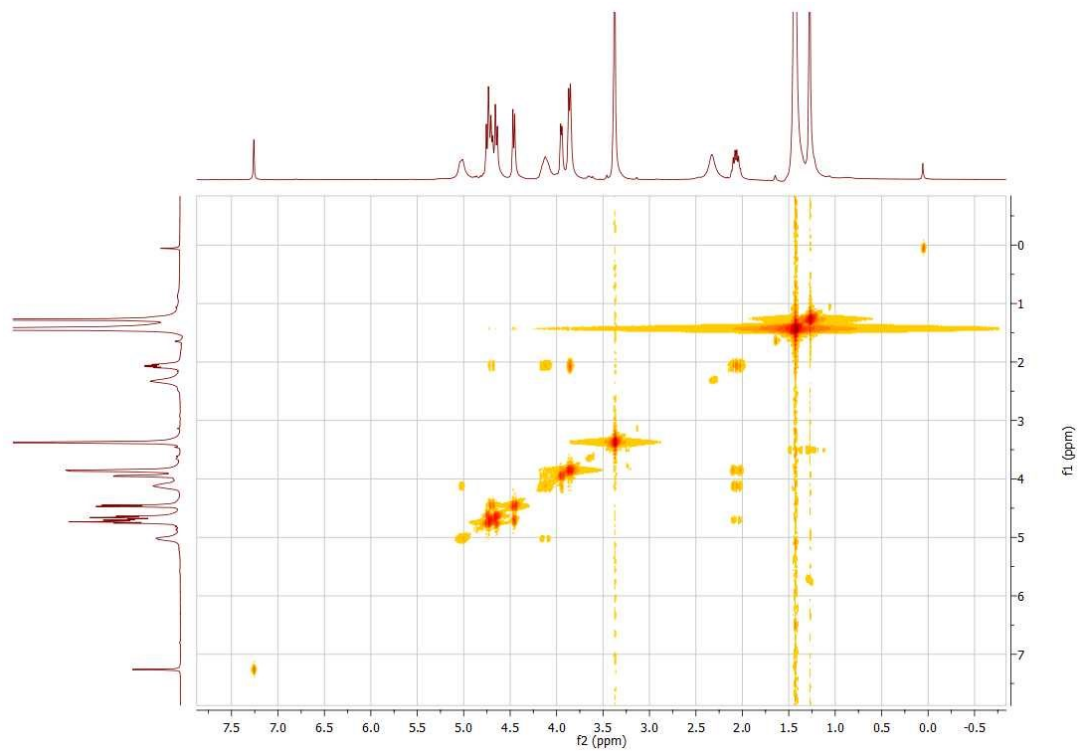

**HSQC (CDCl<sub>3</sub>): Compound 21**

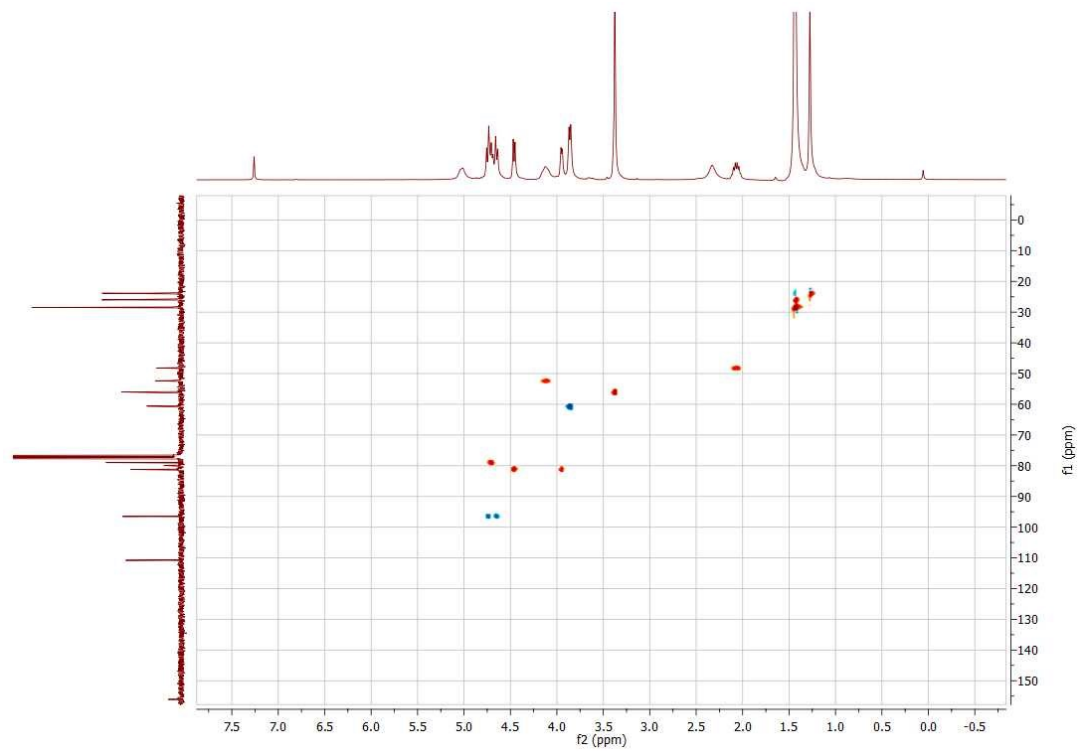

**(1*S*,2*S*,3*S*,4*S*,5*R*)-4-Amino-5-(hydroxymethyl)cyclopentane-1,2,3-triol or 1-Amino- $\alpha$ -D-galacto-cyclopentane (22)**

<sup>1</sup>H NMR (300 MHz, D<sub>2</sub>O, free base): Compound 22

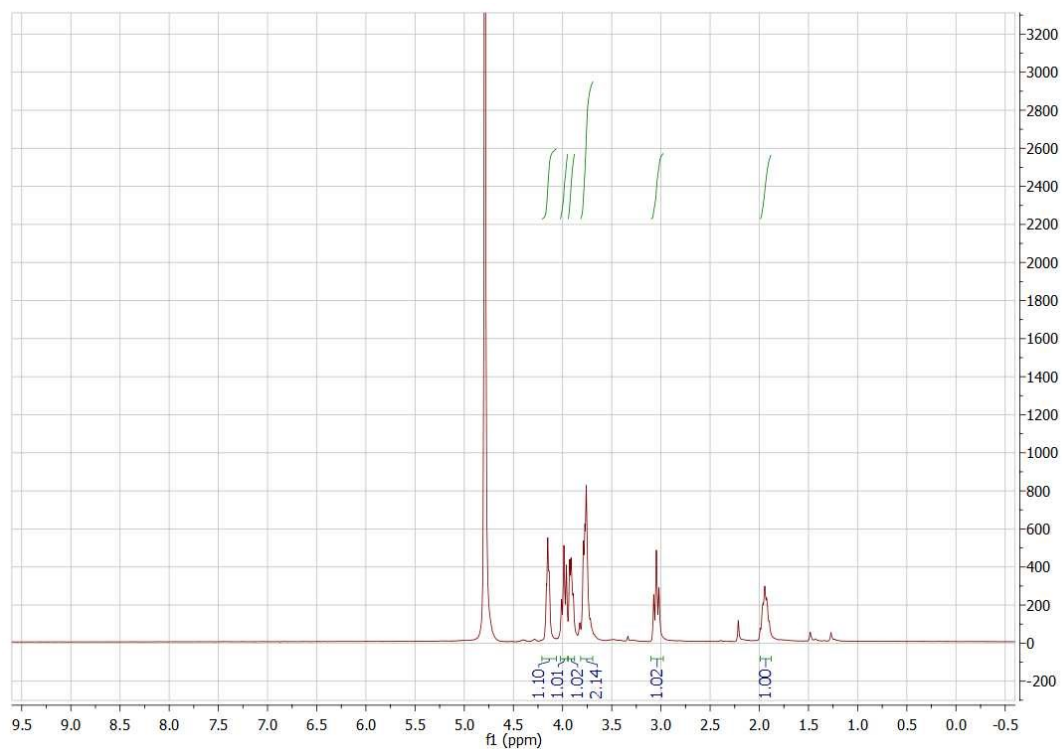

<sup>13</sup>C NMR (75.5 MHz, D<sub>2</sub>O, free base): Compound 22

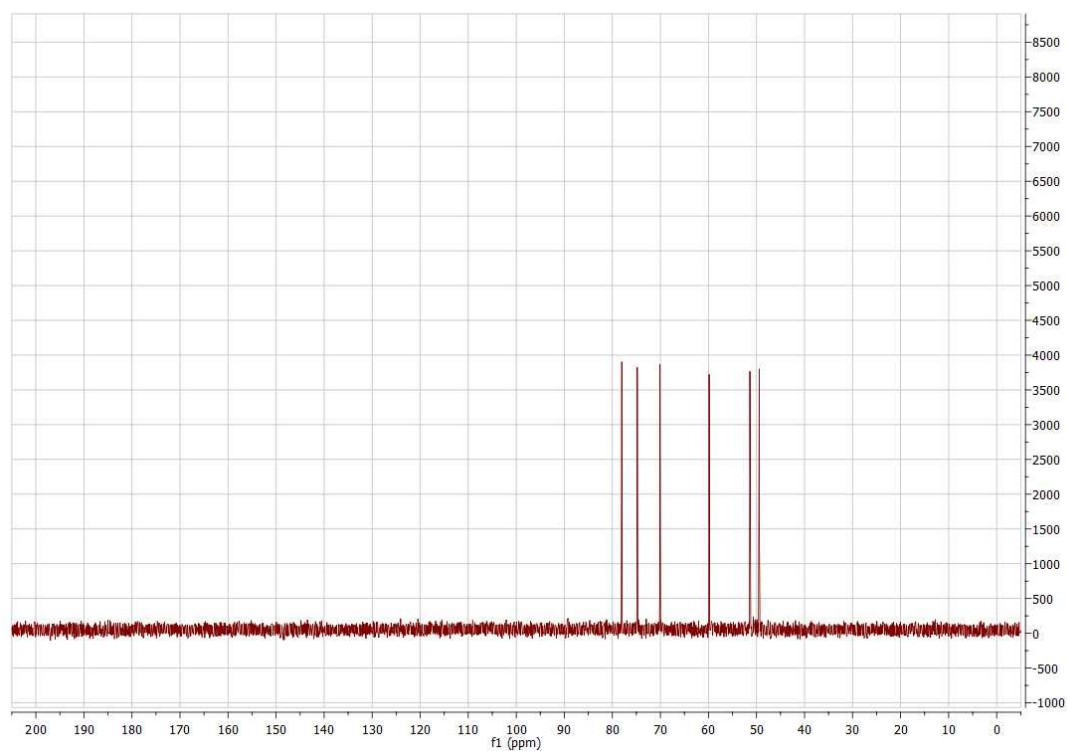

COSY (D<sub>2</sub>O, free base): Compound **22**

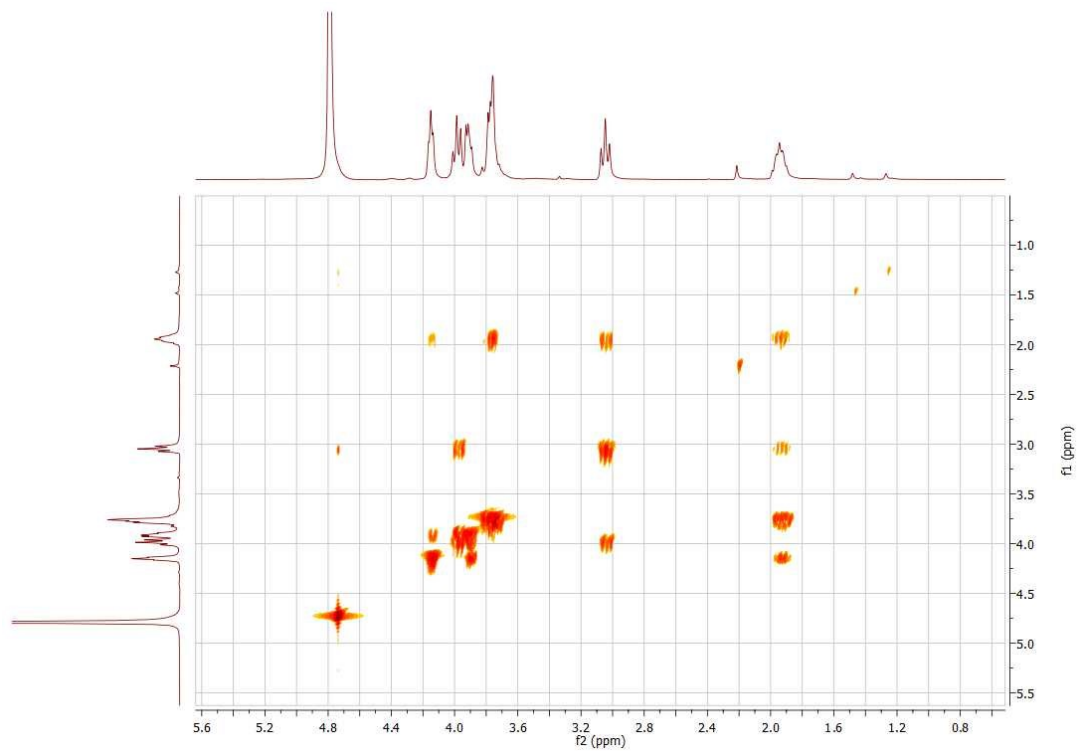

HSQC (D<sub>2</sub>O, free base): Compound **22**

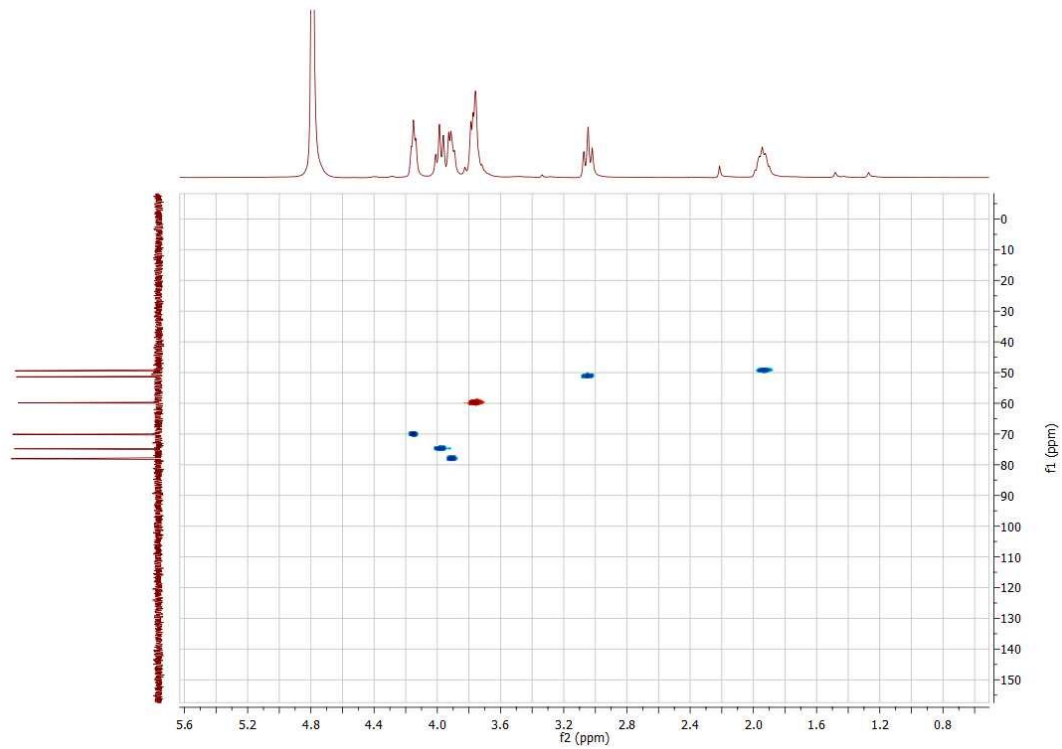

**<sup>1</sup>H NMR (300 MHz, D<sub>2</sub>O, hydrochloride): Compound 22·HCl**

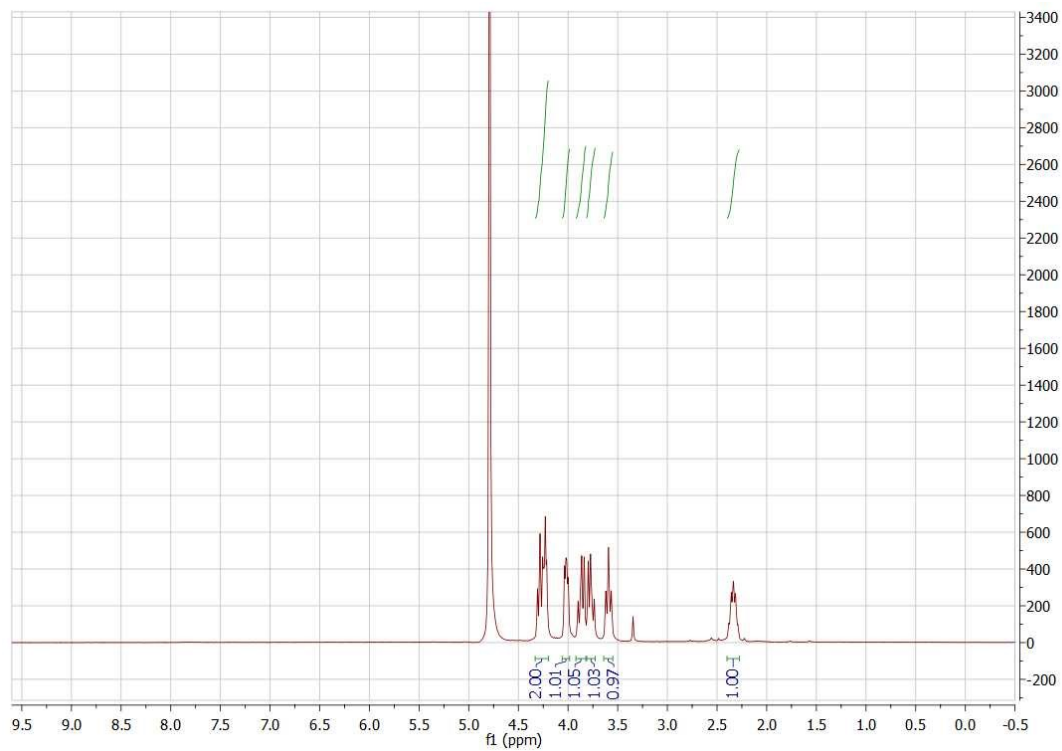

**<sup>13</sup>C NMR (75.5 MHz, D<sub>2</sub>O, hydrochloride): Compound 22·HCl**

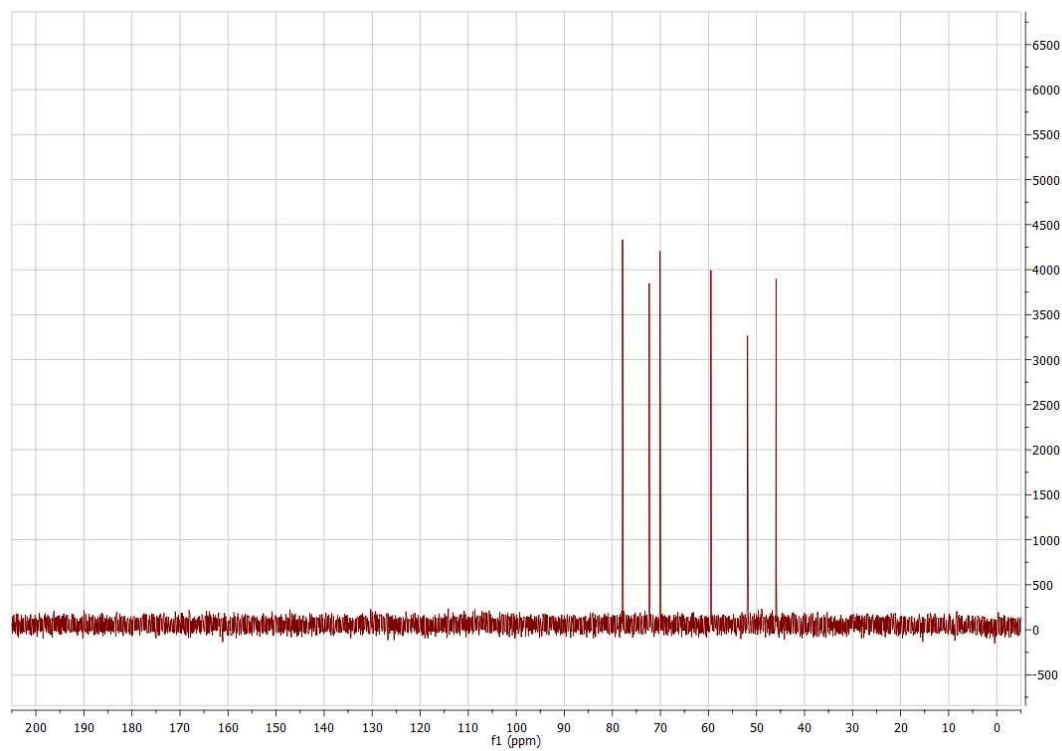

**COSY** (D<sub>2</sub>O, hydrochloride): Compound **22**·HCl

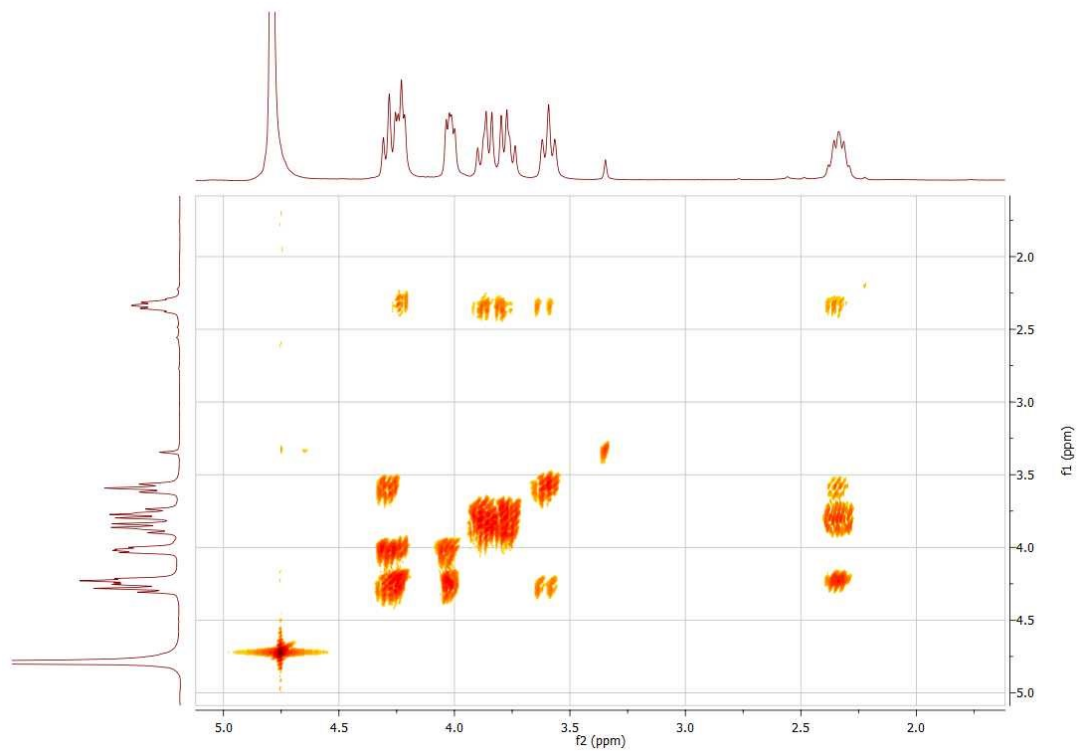

**HSQC** (D<sub>2</sub>O, hydrochloride): Compound **22**·HCl

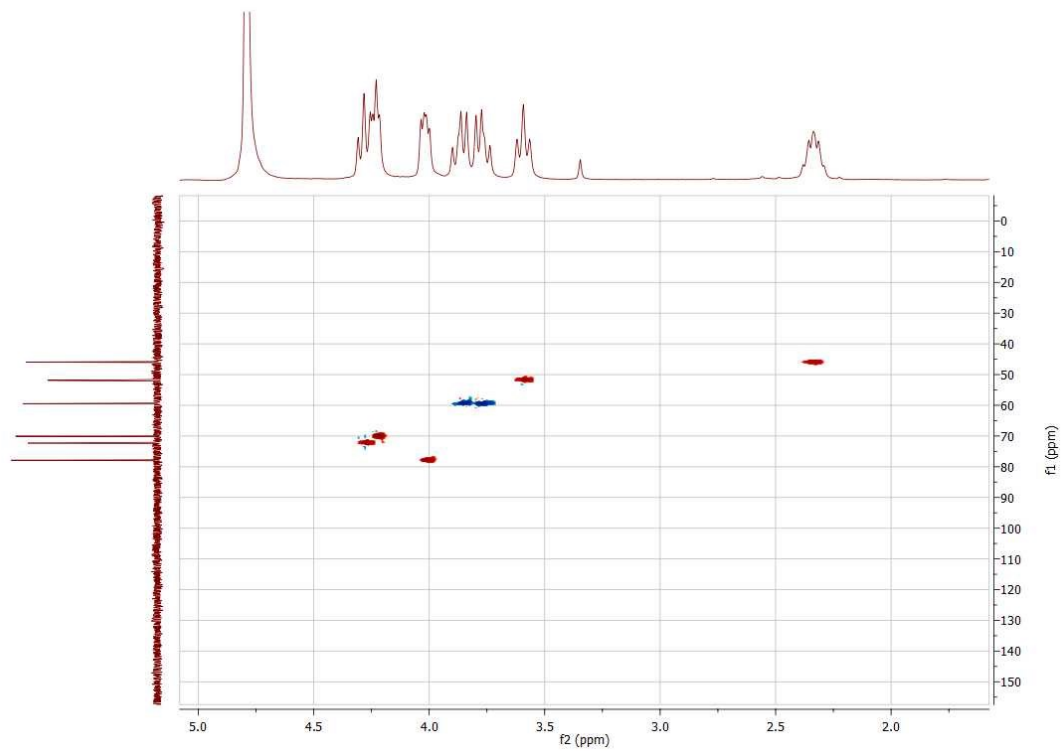

**(1*S*,2*S*,3*S*,4*S*,5*R*)-4-(*n*-Hexylamino)-5-(hydroxymethyl)cyclopentane-1,2,3-triol or 1-(Hexyl)amino- $\alpha$ -D-galacto-cyclopentane (**23**)**

<sup>1</sup>H NMR (300 MHz, CD<sub>3</sub>OD): Compound **23**

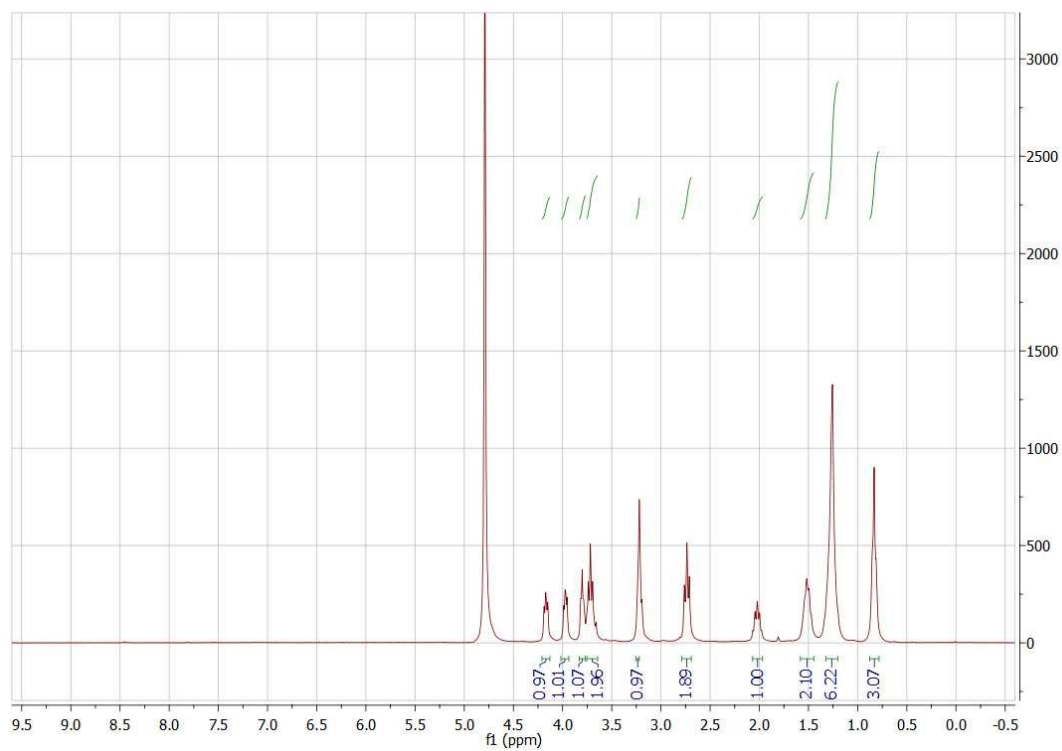

<sup>13</sup>C NMR (75.5 MHz, CD<sub>3</sub>OD): Compound **23**

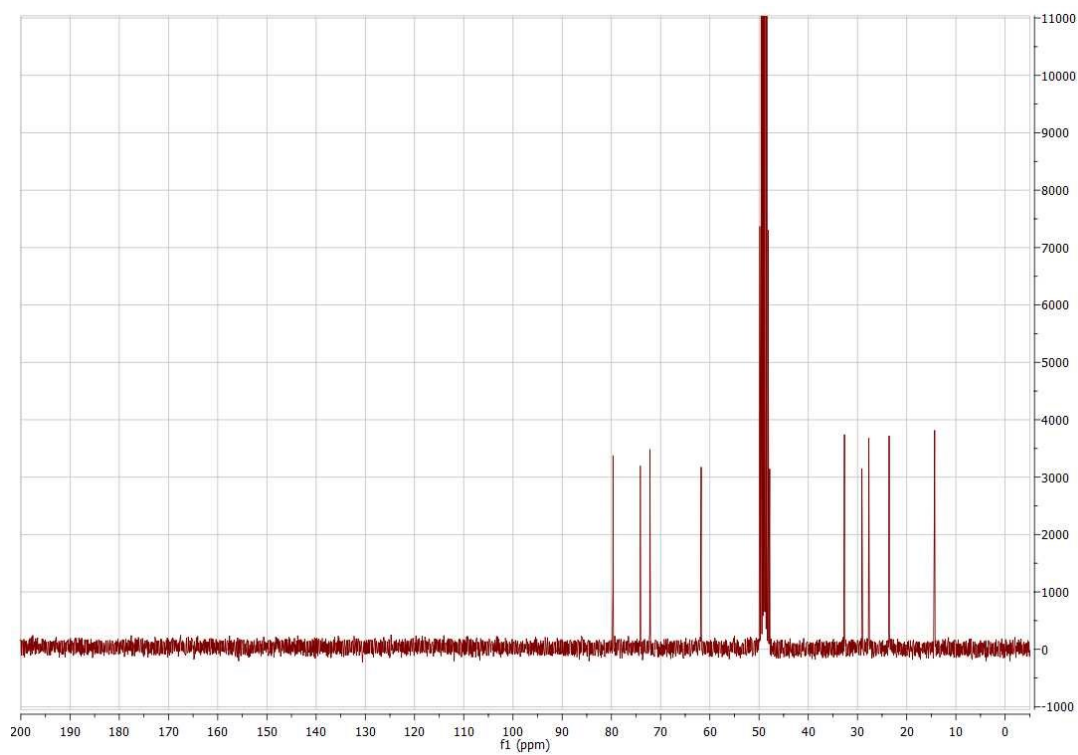

**COSY (CD<sub>3</sub>OD): Compound 23**

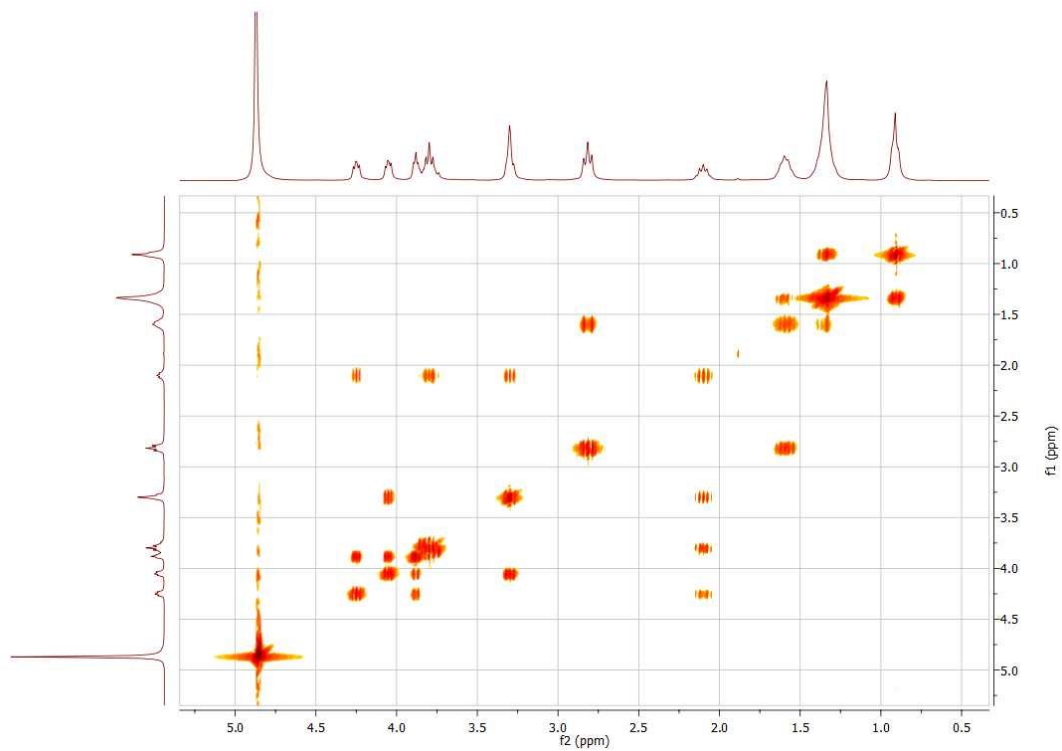

**HSQC (CD<sub>3</sub>OD): Compound 23**

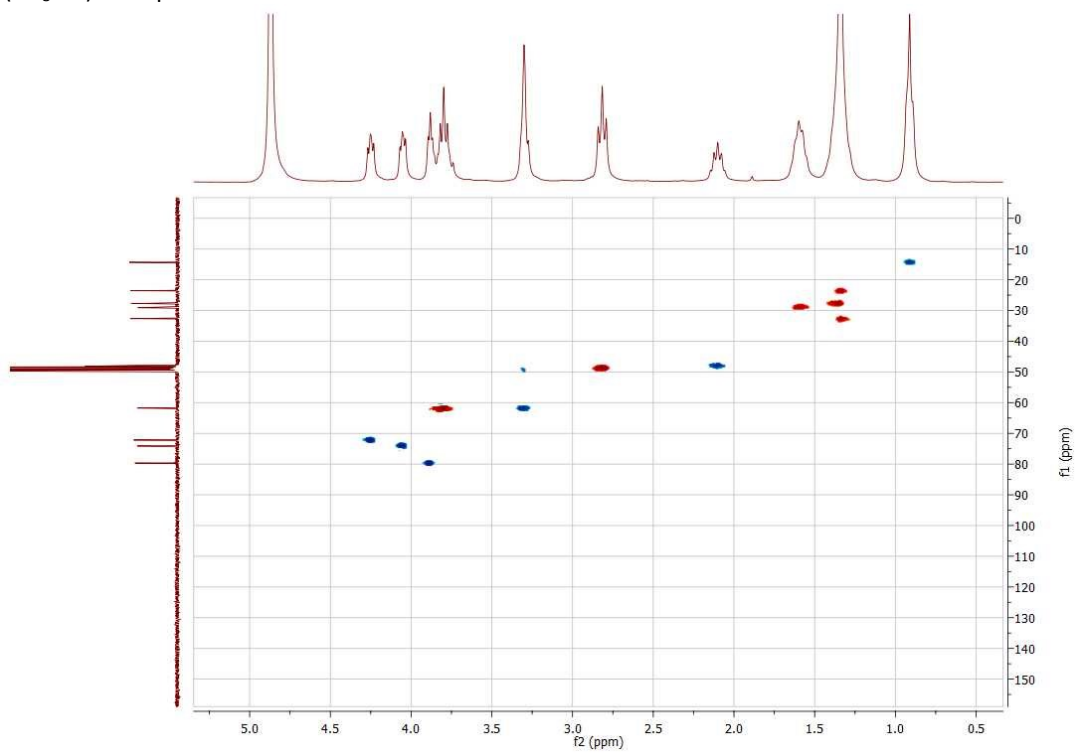

**(1*S*,2*S*,3*S*,4*S*,5*R*)-4-(*n*-Nonylamino)-5-(hydroxymethyl)cyclopentane-1,2,3-triol or 1-(Nonyl)amino- $\alpha$ -D-galacto-cyclopentane (**24**)**

<sup>1</sup>H NMR (300 MHz, CD<sub>3</sub>OD): Compound **24**

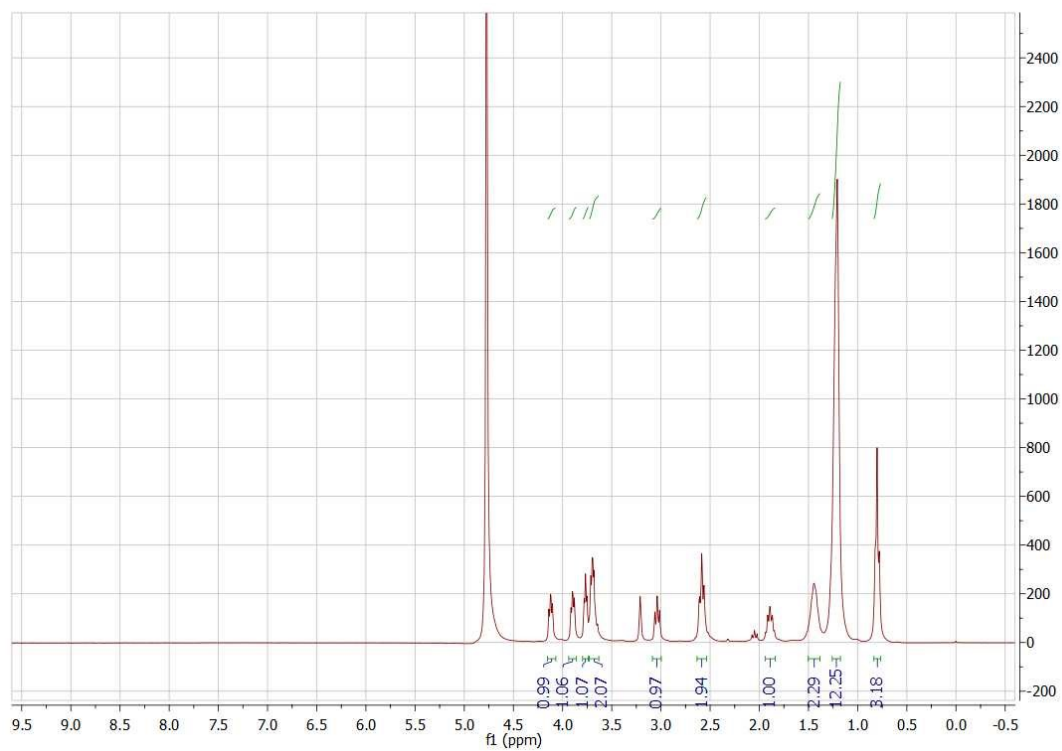

<sup>13</sup>C NMR (75.5 MHz, CD<sub>3</sub>OD): Compound **24**

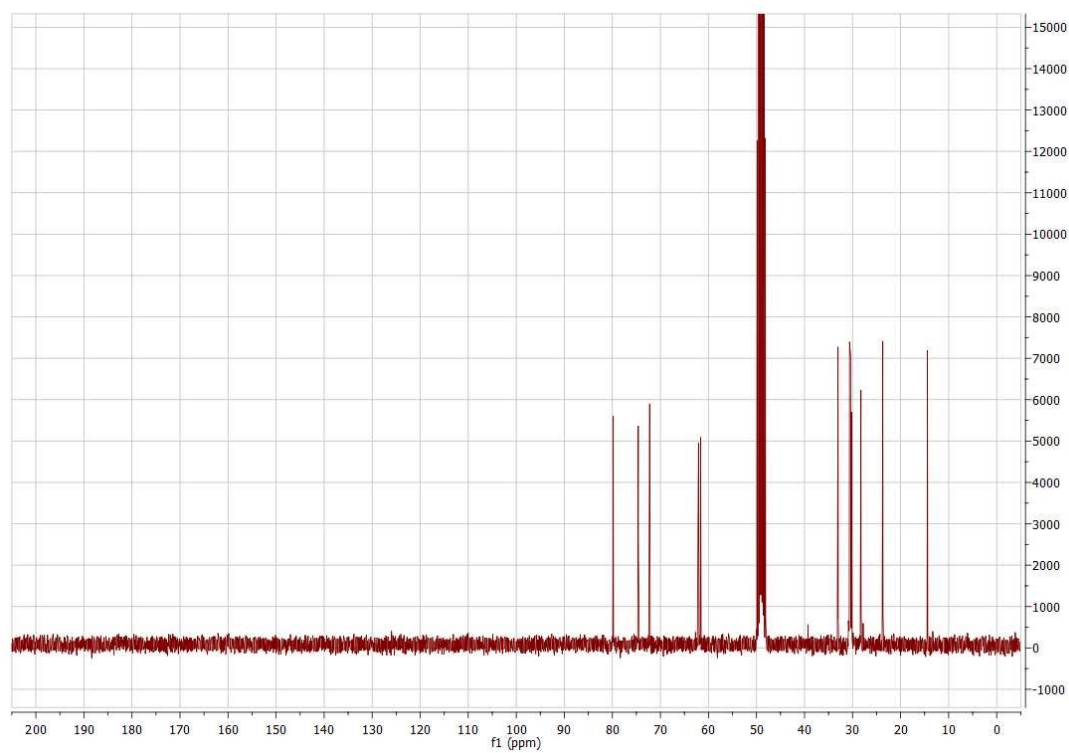



**COSY (CD<sub>3</sub>OD): Compound 24**

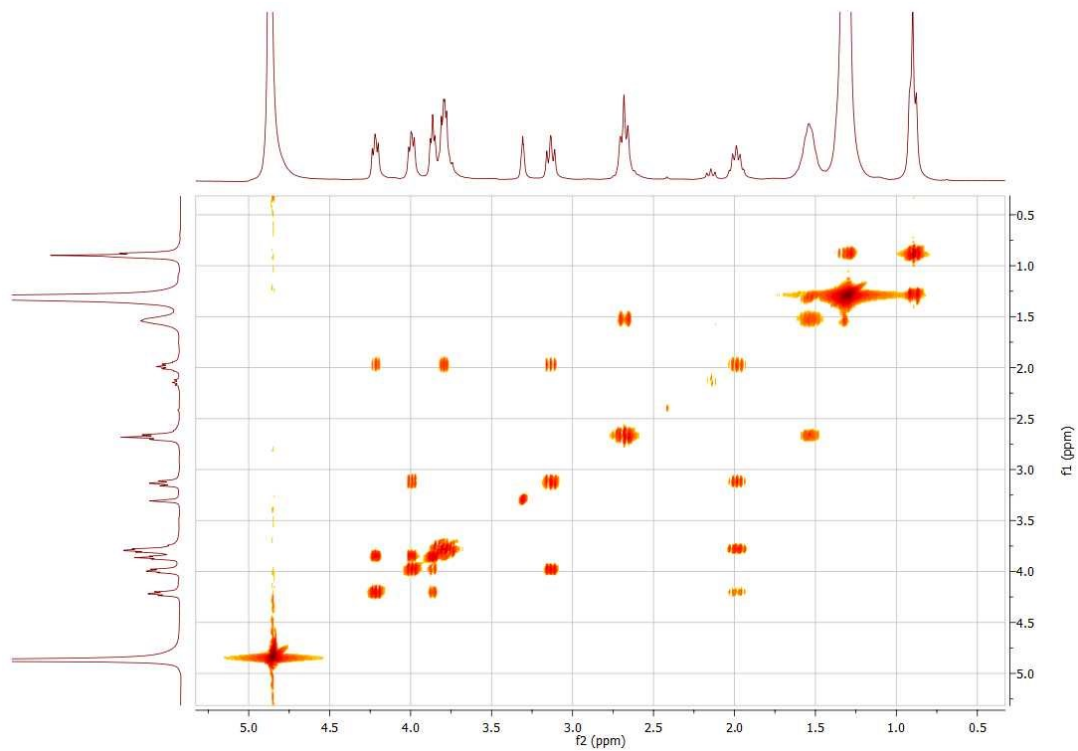

**HSQC (CD<sub>3</sub>OD): Compound 24**

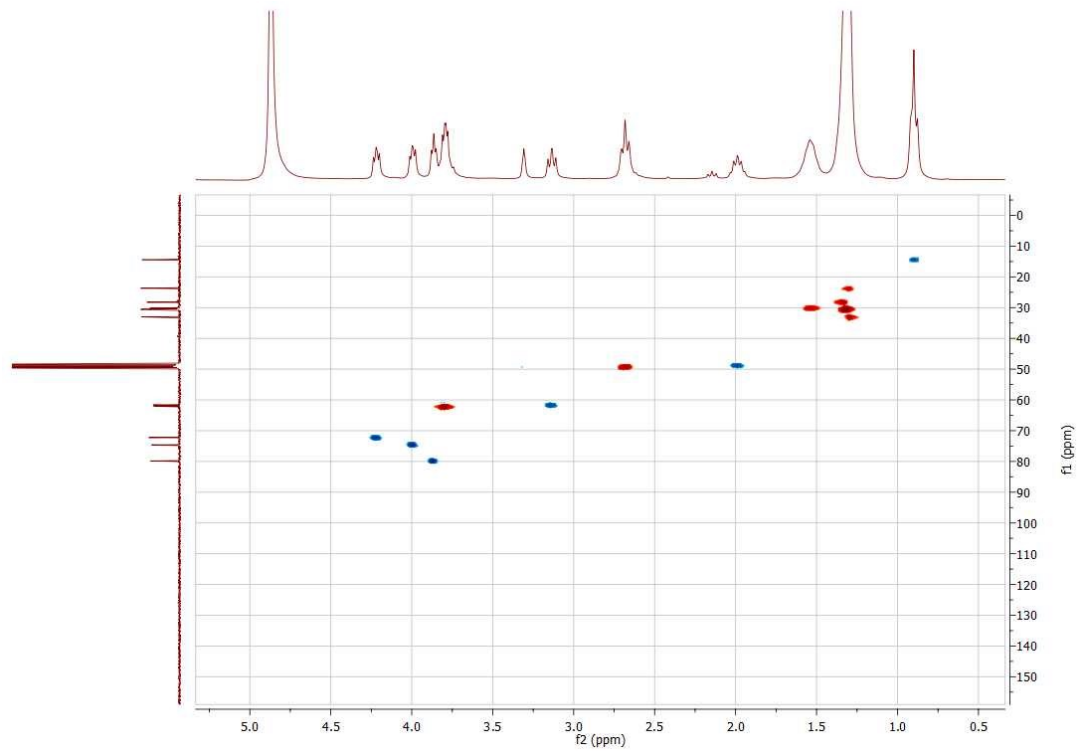

**6-(((1S,2S,3S,4S,5R)-2,3,4-Trihydroxy-5-(hydroxymethyl)cyclopentyl)amino)hexanenitrile  
or 1-(6-Cyanoethyl)amino- $\alpha$ -D-galacto-cyclopentane (26)**

<sup>1</sup>H NMR (300 MHz, CD<sub>3</sub>OD): Compound 25

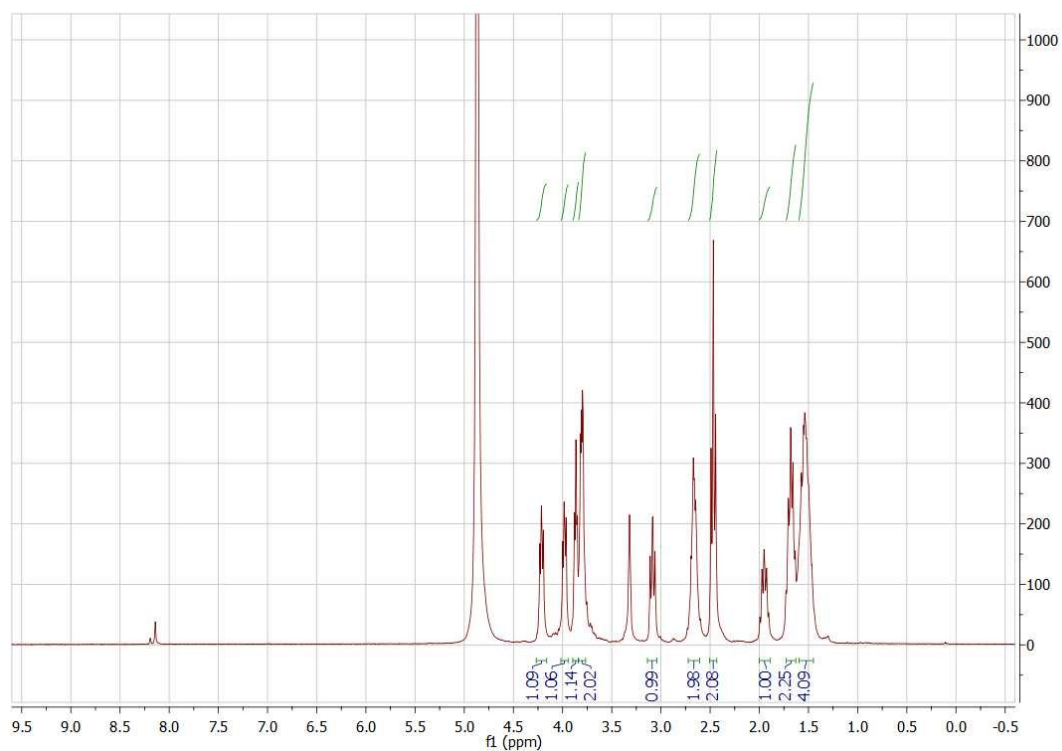

<sup>13</sup>C NMR (75.5 MHz, CD<sub>3</sub>OD): Compound 25

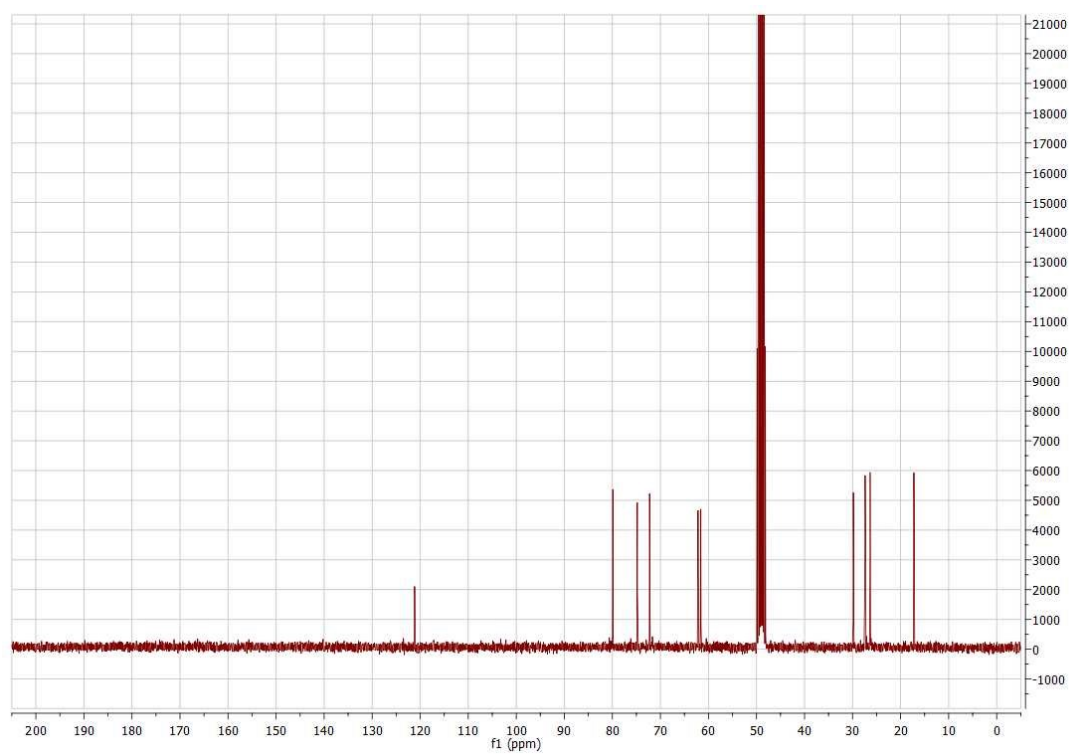

**COSY (CD<sub>3</sub>OD): Compound 25**

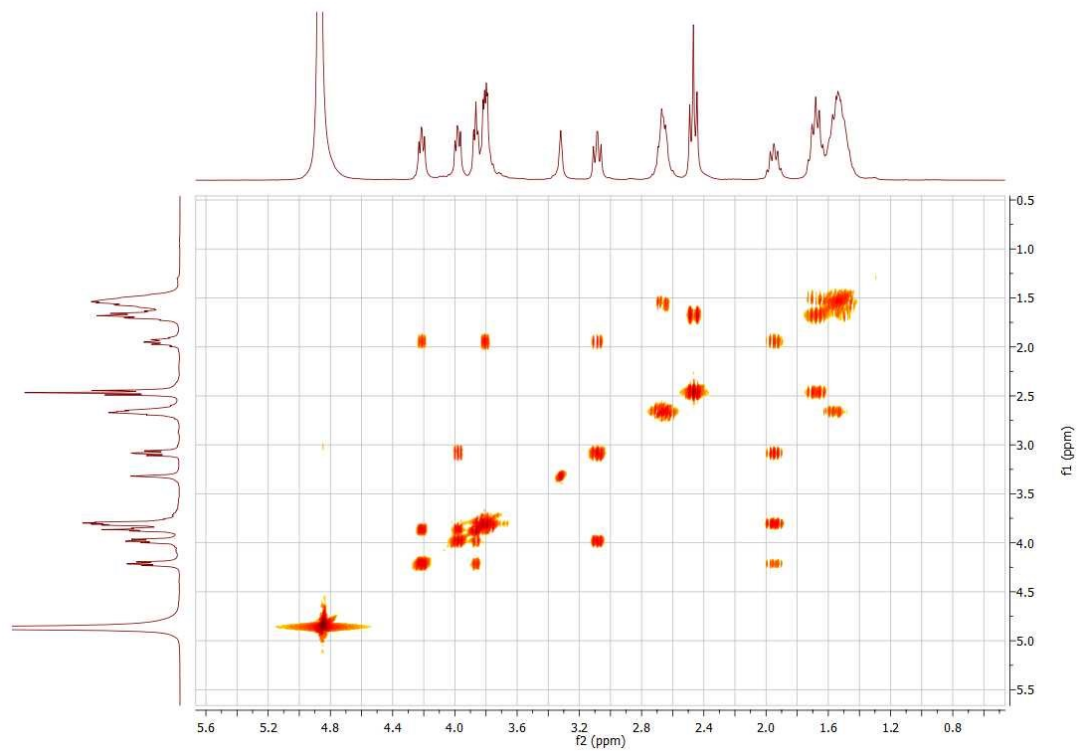

**HSQC (CD<sub>3</sub>OD): Compound 25**

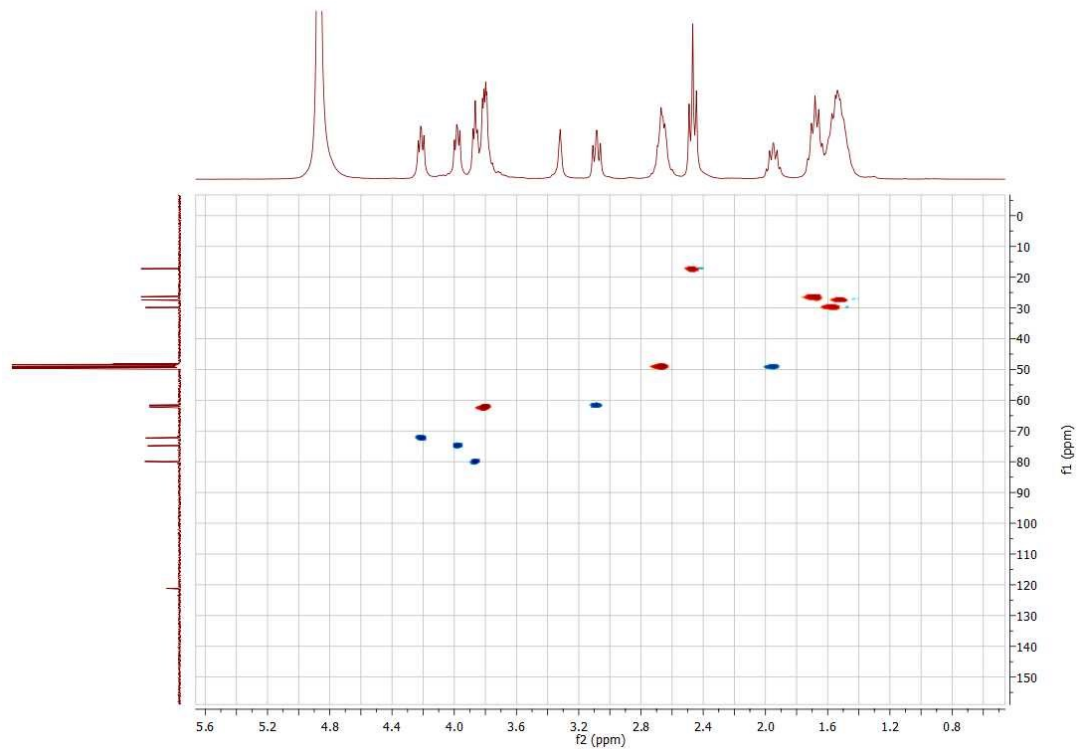

**(1S,2S,3S,4S,5R)-4-[(6-Aminohexyl)amino]-5-(hydroxymethyl)cyclopentane-1,2,3-triol or 1-(6-Aminohexyl)amino- $\alpha$ -D-galacto-cyclopentane (xx)**

**<sup>1</sup>H NMR (300 MHz, CD<sub>3</sub>OD): Compound 26**

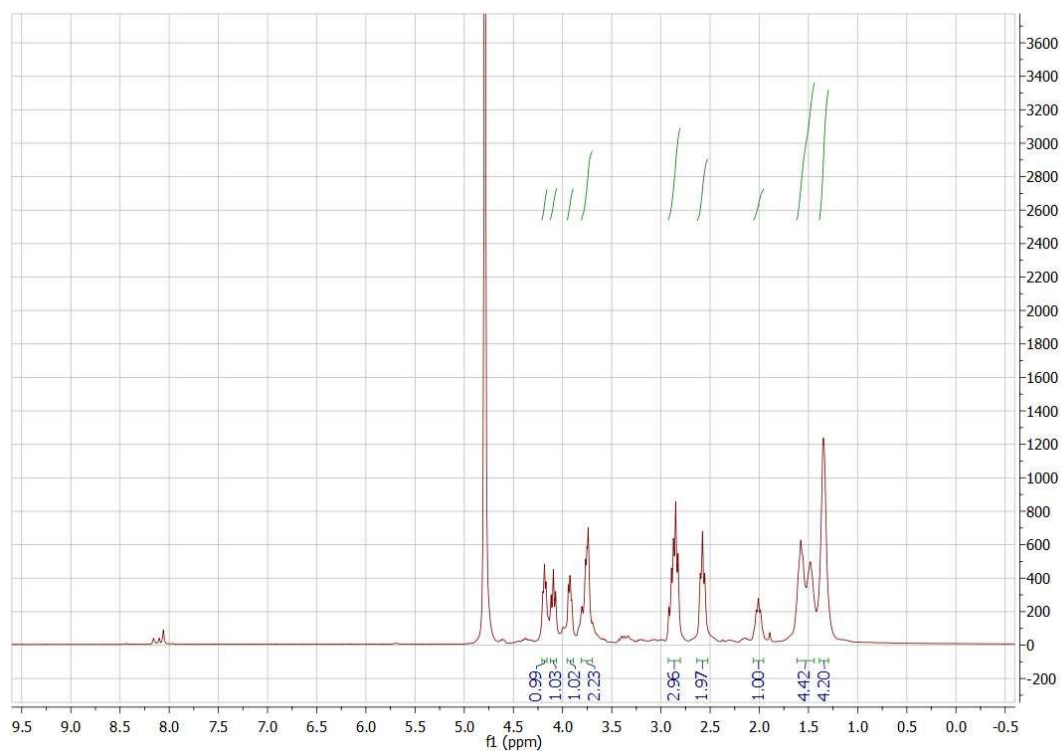

**<sup>13</sup>C NMR (75.5 MHz, CD<sub>3</sub>OD): Compound 26**

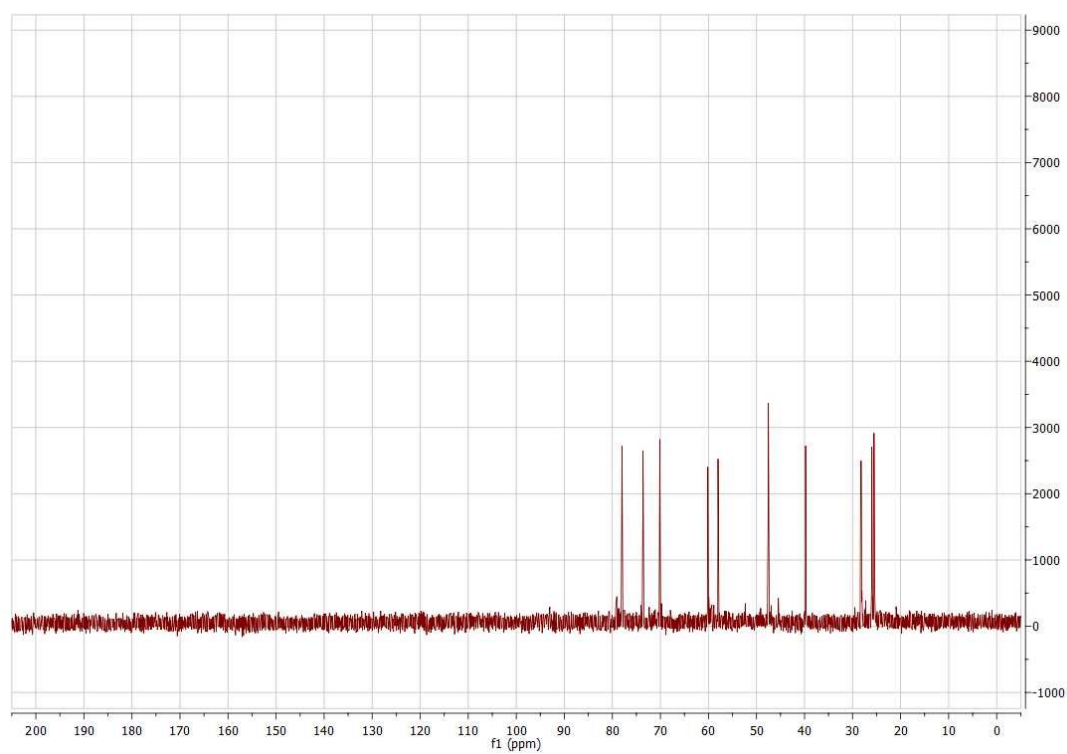

**COSY (CD<sub>3</sub>OD): Compound 26**

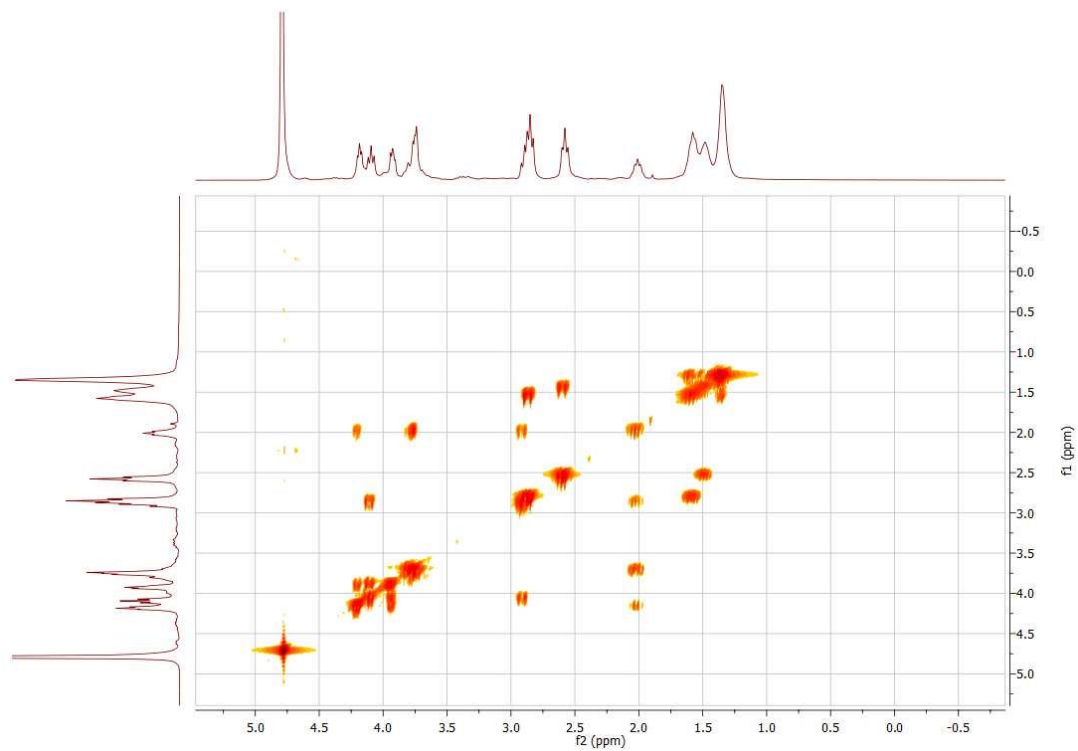

**HSQC (CD<sub>3</sub>OD): Compound 26**

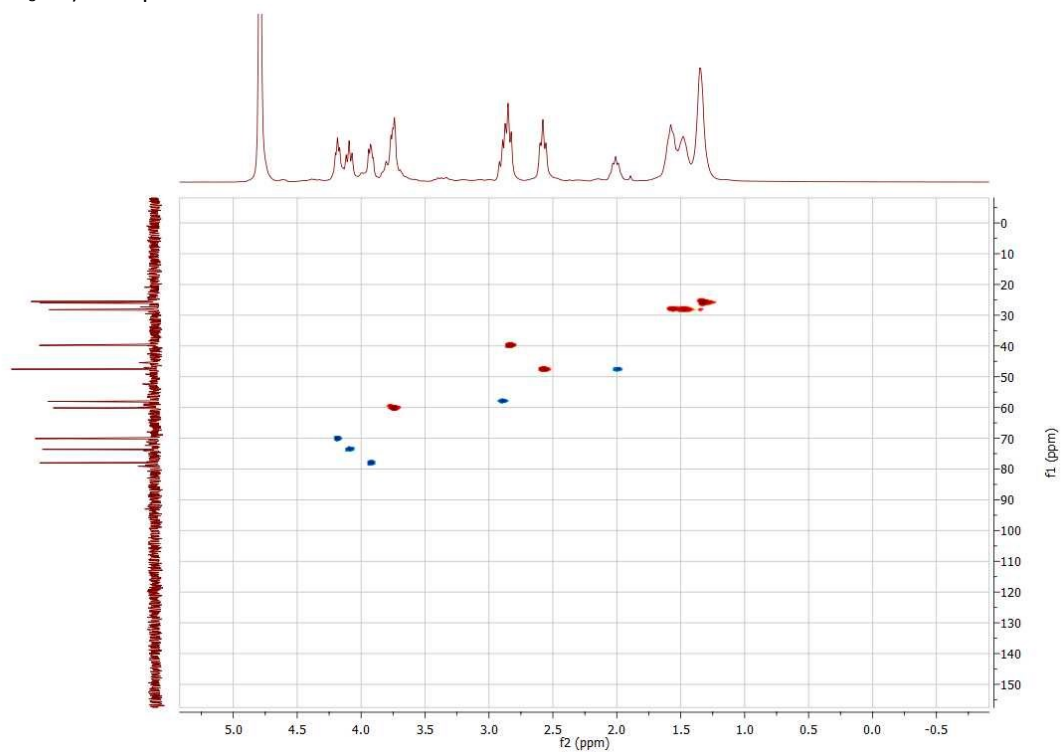

**5-(Dimethylamino)-N-(6-{{{(1S,2S,3S,4S,5R)-2,3,4-trihydroxy-5-(hydroxymethyl)cyclopentyl} amino}hexyl)naphthalene-1-sulfonamide or 1-(6-Dansylaminohexyl)amino- $\alpha$ -D-galacto-cyclopentane (27)**

**<sup>1</sup>H NMR (300 MHz, CD<sub>3</sub>OD): Compound 27**

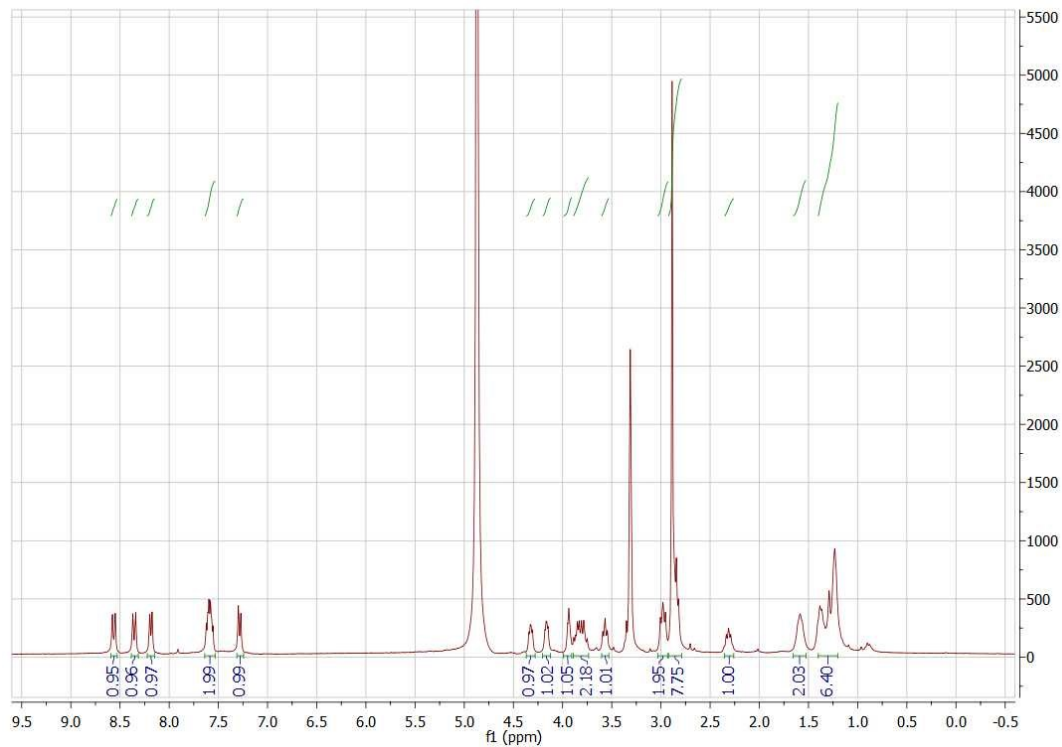

**<sup>13</sup>C NMR (75.5 MHz, CD<sub>3</sub>OD): Compound 27**

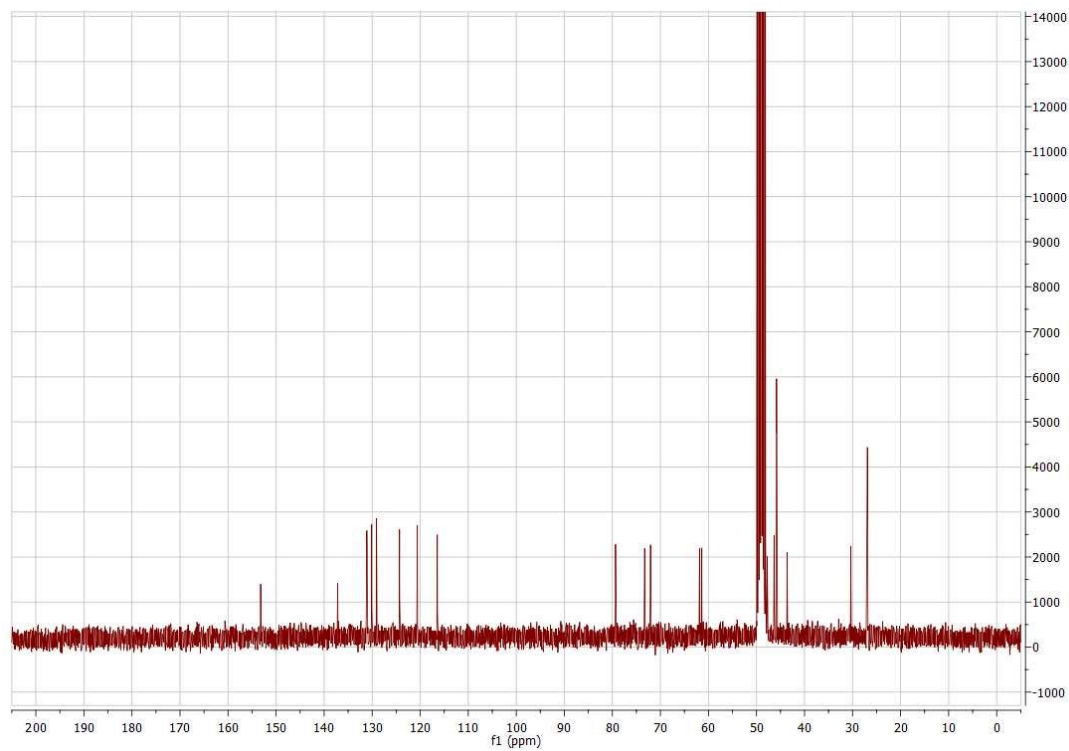

**COSY (CD<sub>3</sub>OD): Compound 27**

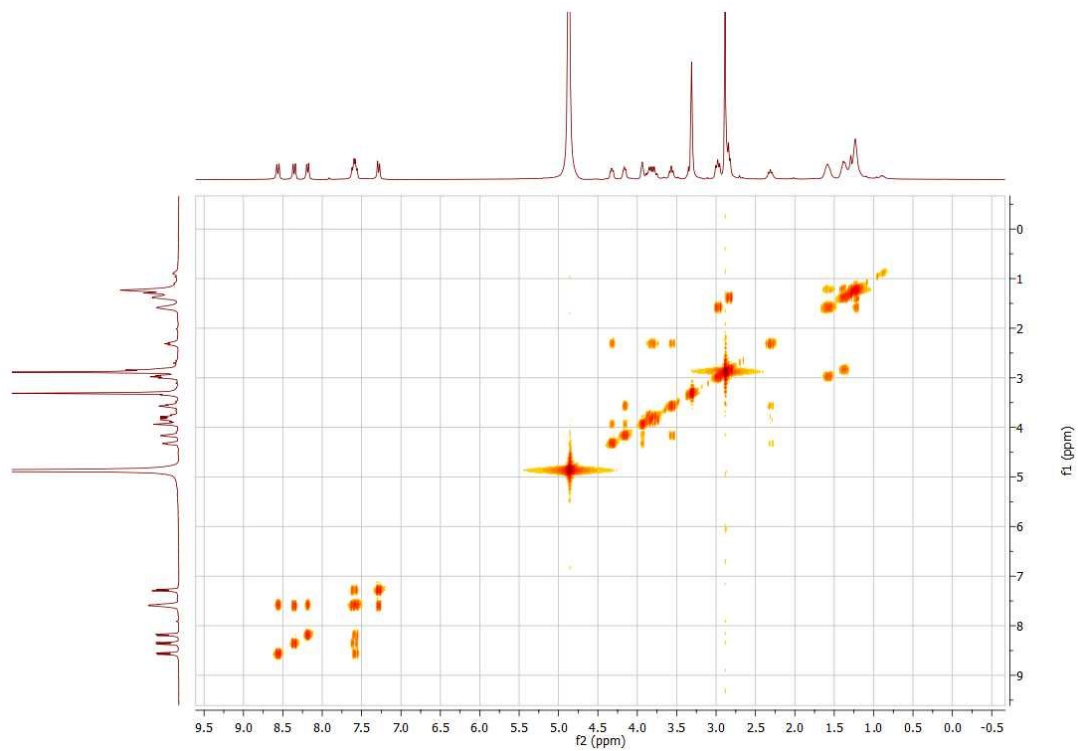

**HSQC (CD<sub>3</sub>OD): Compound 27**

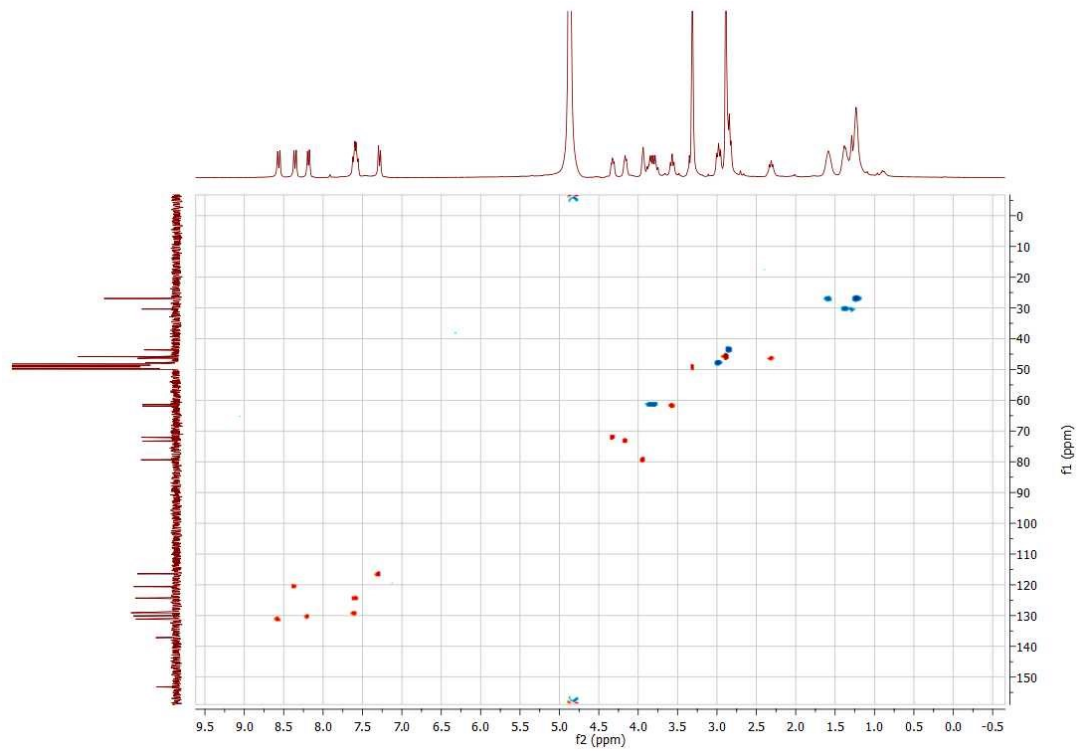

Supplement: d1ra02507d1.pdf [file d1ra02507d1.pdf]
